# Supplementary material for: Multiphoton breakdown of acetylene; formation of organic building block fragments
Source: Royal Society of Chemistry journal article supplement (doi:10.1039/d2cp04467f), 2022-12-09
Supplement: d2cp04467f1.pdf [file d2cp04467f1.pdf]

# Multiphoton breakdown of acetylene; Formation of organic building block fragments

Meng-Xu Jiang<sup>1</sup>, Ioannis Giannakidis<sup>2</sup>, Peter C. Samartzis<sup>2\*</sup> and Ágúst Kvaran<sup>1\*</sup>

1. *Science Institute, University of Iceland, Dunhagi 3, 107 Reykjavík, Iceland.*
2. *Institute of Electronic Structure and Laser, Foundation for Research and Technology-Hellas, Vassilika Vouton, 71110 Heraklion, Greece.*

## Supplementary material

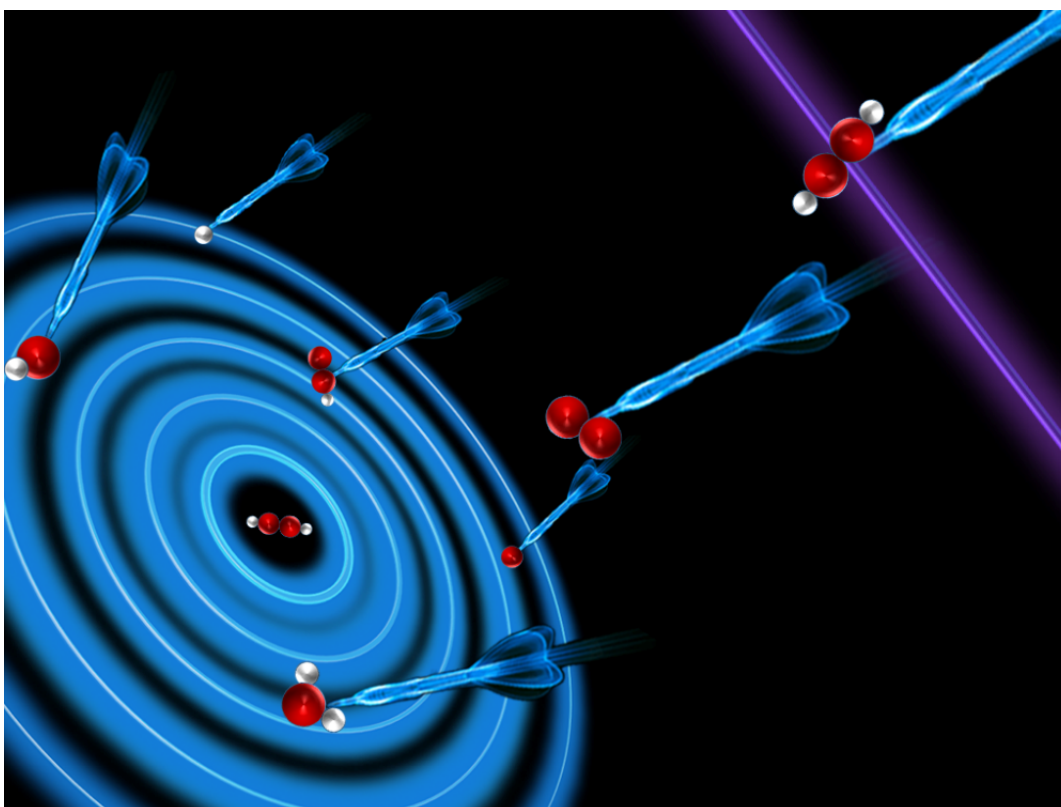

| <b>Content:</b>                                                           | <b>pages:</b> |
|---------------------------------------------------------------------------|---------------|
| <b>Figures:</b>                                                           |               |
| Fig. S1: Photoelectron spectra extracted from reference 1.....            | 4             |
| Fig. S2: Photoelectron images for excitations no. 1 – 7 (Table S1).....   | 5             |
| Fig. S3, a - h: Electron KERs and energy thresholds .....                 | 6-13          |
| Fig. S4, H <sup>+</sup> ion images:.....                                  | 14            |
| Fig. S5, H <sup>+</sup> KER spectra:.....                                 | 15            |
| Fig. S6, C <sup>+</sup> ion images:.....                                  | 16            |
| Fig. S7, C <sup>+</sup> KER spectra:.....                                 | 17            |
| Fig. S8, CH <sup>+</sup> ion images:.....                                 | 18            |
| Fig. S9, CH <sup>+</sup> KER spectra:.....                                | 19            |
| Fig. S10, C <sub>2</sub> <sup>+</sup> ion images:.....                    | 20            |
| Fig. S11, C <sub>2</sub> <sup>+</sup> KER spectra:.....                   | 21            |
| Fig. S12, C <sub>2</sub> H <sup>+</sup> ion images:.....                  | 22            |
| Fig. S13, C <sub>2</sub> H <sup>+</sup> KER spectra:.....                 | 23            |
| Fig. S14, H <sup>+</sup> angular distributions:.....                      | 24            |
| Fig. S15, C <sup>+</sup> angular distributions:.....                      | 25            |
| Fig. S16, CH <sup>+</sup> angular distributions:.....                     | 26            |
| Fig. S17, C <sub>2</sub> <sup>+</sup> angular distributions:.....         | 27            |
| Fig. S18, C <sub>2</sub> H <sup>+</sup> angular distributions: .....      | 28            |
| Fig. S19, Ions angular distributions (separated): .....                   | 29            |
| Fig. S20, photoelectron angular distributions:.....                       | 30-31         |
| Fig. S21, $\beta_2$ parameters vs. ion images:.....                       | 32            |
| Fig. S22, electron KERs for images no. 4-5 (Table S1):.....               | 33            |
| Fig. S23, Potential energy curves for excited C <sub>2</sub> states:..... | 34            |

**Content:** **pages:**

**Tables:**

|                                                                                                                    |               |
|--------------------------------------------------------------------------------------------------------------------|---------------|
| <b>Table S1: Images and resonant excitations.....</b>                                                              | <b>35</b>     |
| <b>Table S2: Anisotropy parameters for images.....</b>                                                             | <b>36-38</b>  |
| <b>a) <math>\beta_2</math>, <math>\beta_4</math>, and <math>\beta_6</math> values for ion images.....</b>          | <b>36</b>     |
| <b>b) <math>\beta_2</math> and <math>\beta_4</math> values for electron images ( repeller voltage: -3kV) .....</b> | <b>37</b>     |
| <b>c) <math>\beta_2</math> and <math>\beta_4</math> values for electron images (repeller voltage: -5kV) .....</b>  | <b>38</b>     |
| <b>Table S3, Dissociation products:.....</b>                                                                       | <b>39</b>     |
| <b>Table S4, Thresholds: .....</b>                                                                                 | <b>39-40</b>  |
| <b>a) Thresholds vs. fragment dissociation .....</b>                                                               | <b>39</b>     |
| <b>b) Thresholds vs. ionizations .....</b>                                                                         | <b>40</b>     |
| <br><b>References.....</b>                                                                                         | <br><b>41</b> |

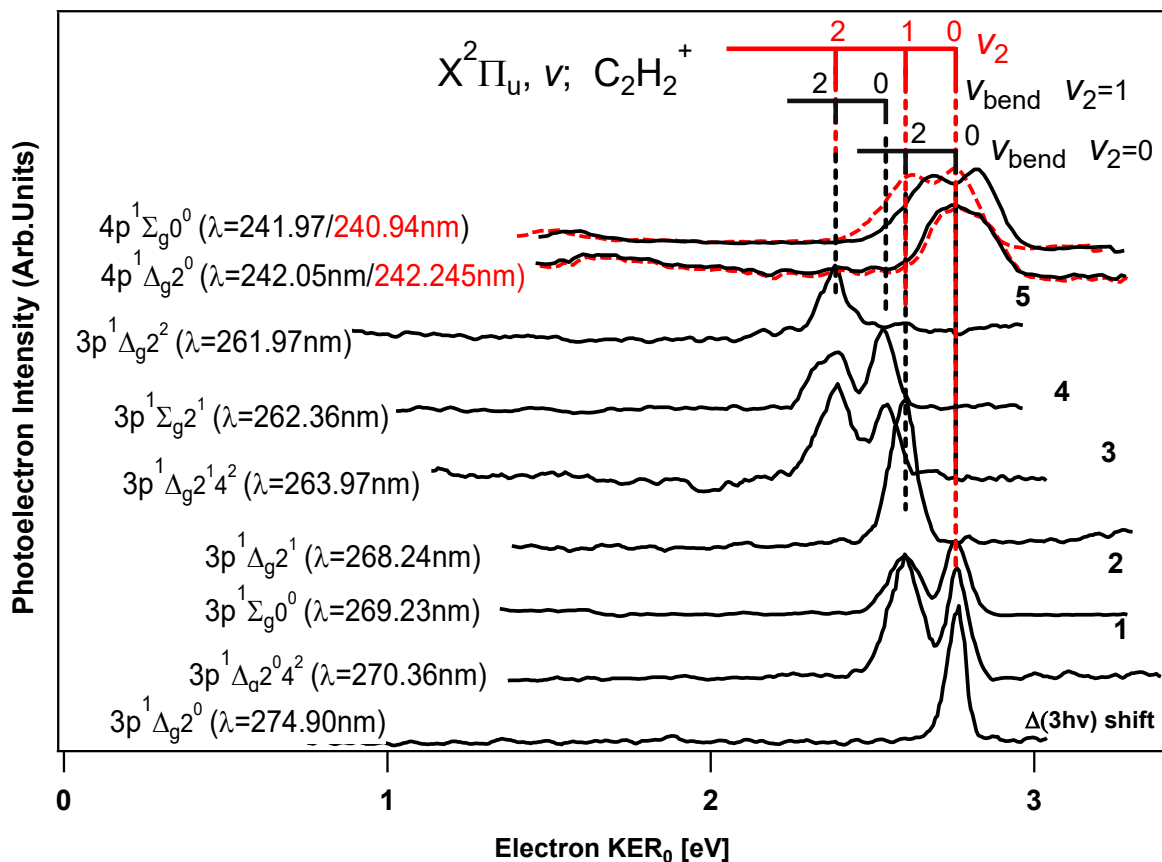

**Fig. S1, Photoelectron spectra:** Photoelectron spectra extracted from reference [1] (black) and from reference [2] (red) plotted as a function of the kinetic energy release (KER) for the spectrum derived by the  $\lambda = 261.97$  nm excitation (“reference spectrum”) shifted by three-photon energy differences, ( $\Delta(3h\nu)$ ) with respect to the “reference spectrum” (see main text / paper). Rydberg states and excitation wavelengths are indicated to the left. KER thresholds / assignments for ionization of fragments, according to reference [1] are indicated by sticks above the spectra.

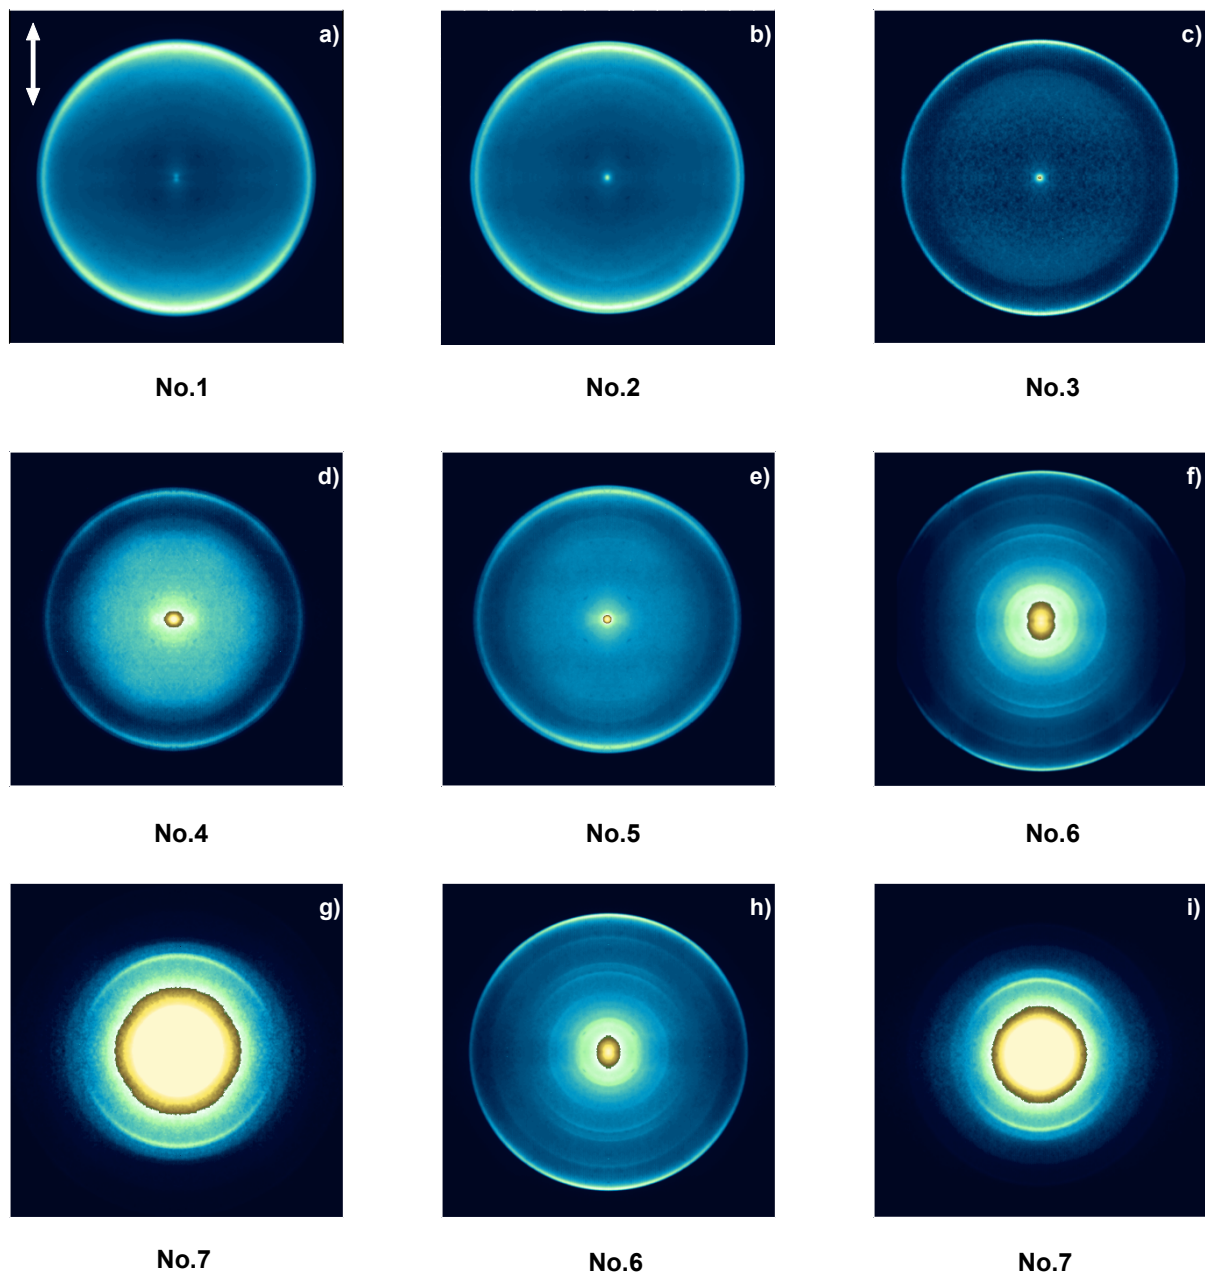

**Fig. S2, photoelectron images:** Photoelectron images for the excitations (no. 1 – 7) listed in **Table S1 (Table 1 in paper)**. Images (a)-(g) and (h)-(i) were recorded for repeller voltages of -3kV and -5kV, respectively. The laser polarization is indicated by a double arrow in (a).

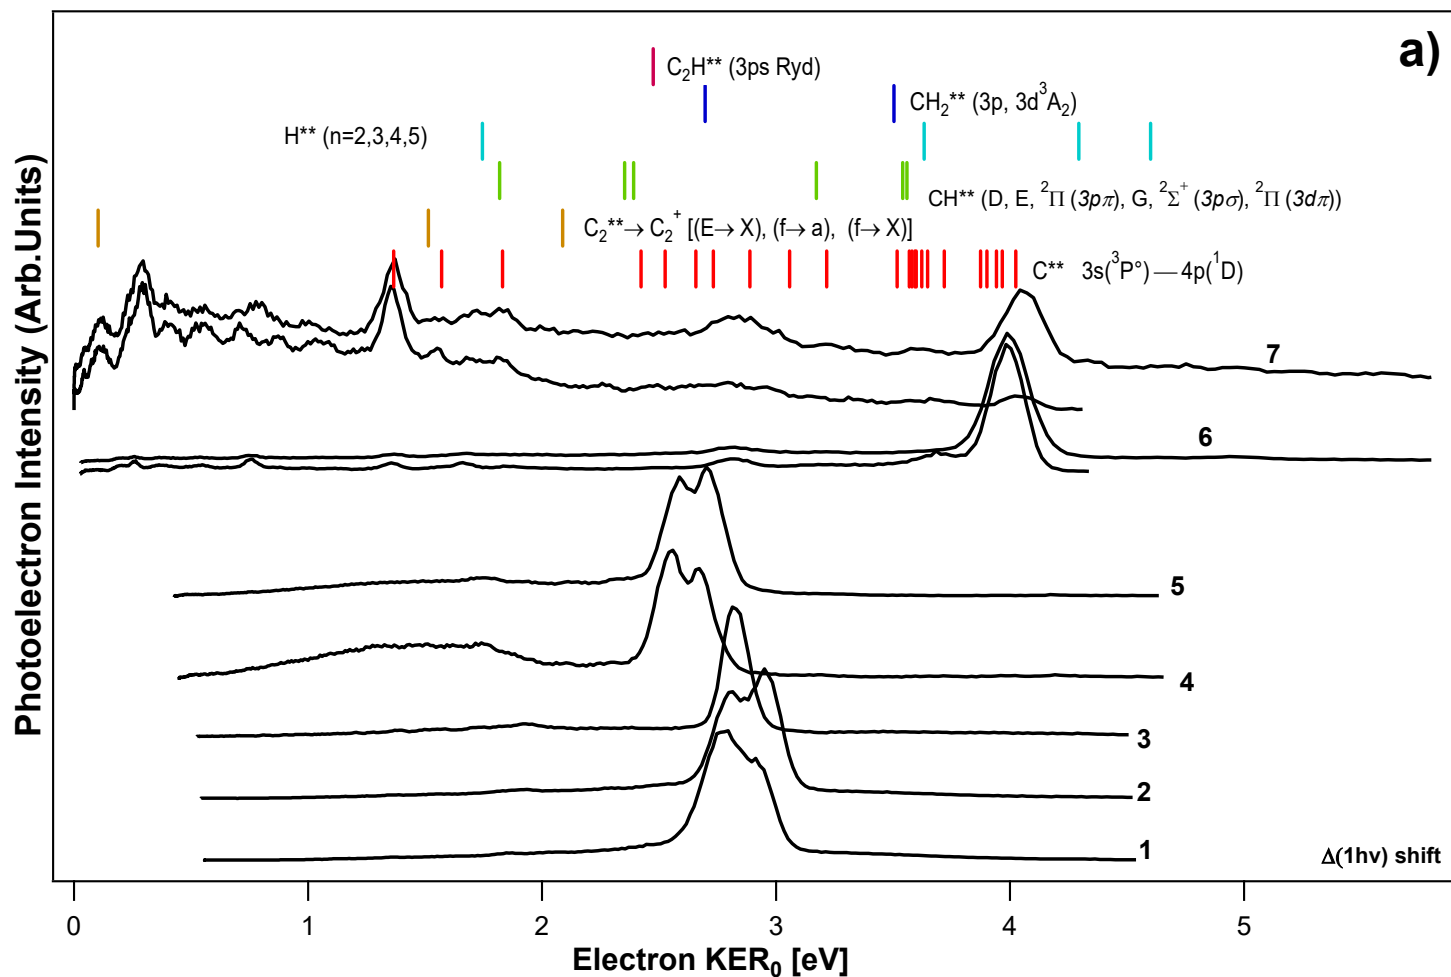

**Fig. S3 (a), Electron KERs and energy thresholds:** e-KERs derived from images no. 1 – 7 (Table S1) plotted as a function of the kinetic energy release (KER) for the no. 7 (KER<sub>0</sub>), shifted by one-photon energy differences, Δ(1hv) with respect to the “reference spectrum”, no. 7 (see main text). KER thresholds for ionization of fragments, as specified, are indicated by sticks above the spectra.

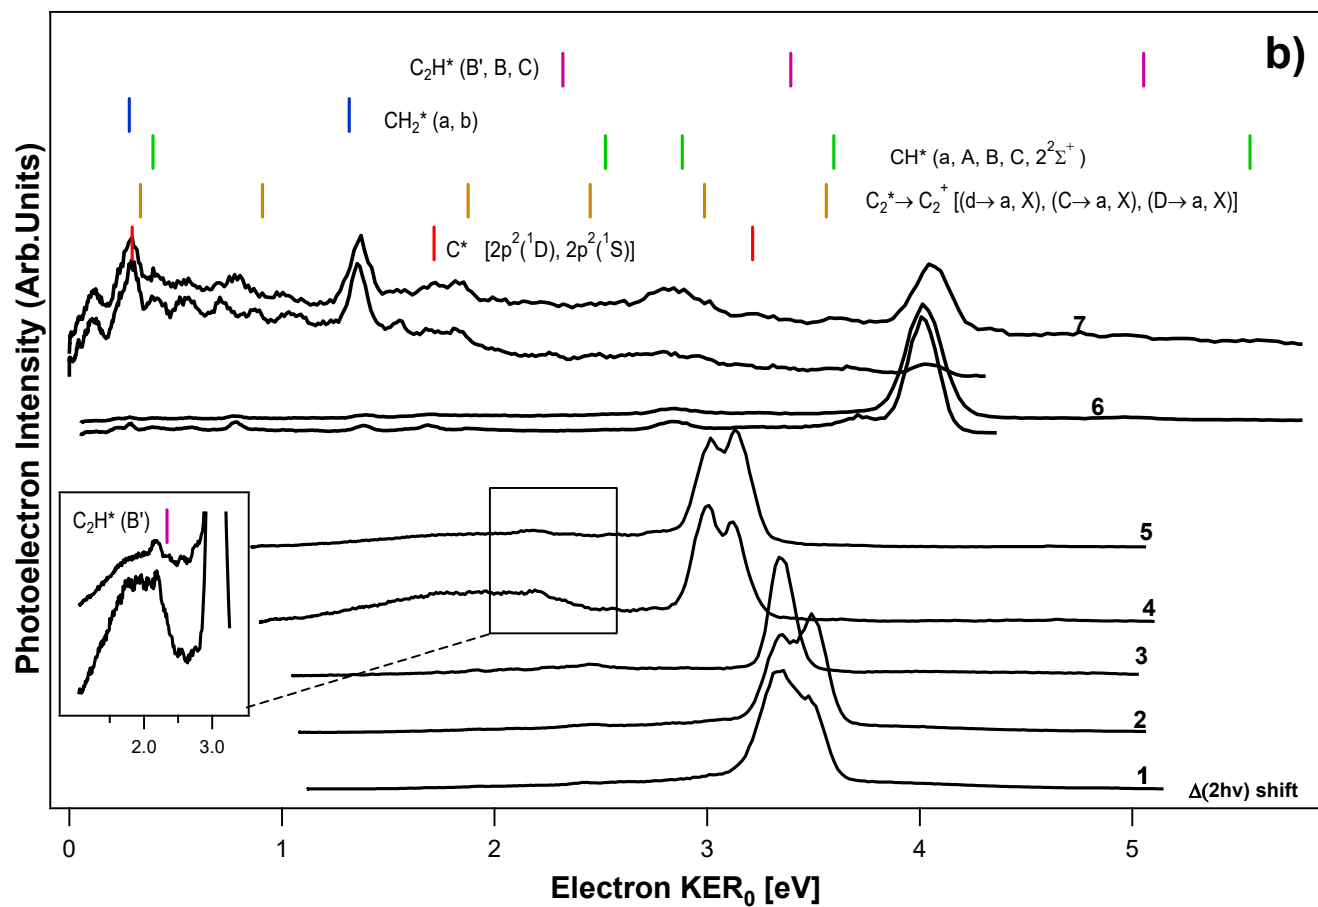

**Fig. S3 (b), Electron KERs and energy thresholds:** e-KERs derived from images no. 1 – 7 (Table S1) plotted as a function of the kinetic energy release (KER) for the no. 7 ( $KER_0$ ), shifted by two-photon energy differences,  $\Delta(2h\nu)$  with respect to the “reference spectrum”, no. 7 (see main text). KER thresholds for ionization of fragments, as specified, are indicated by sticks above the spectra.

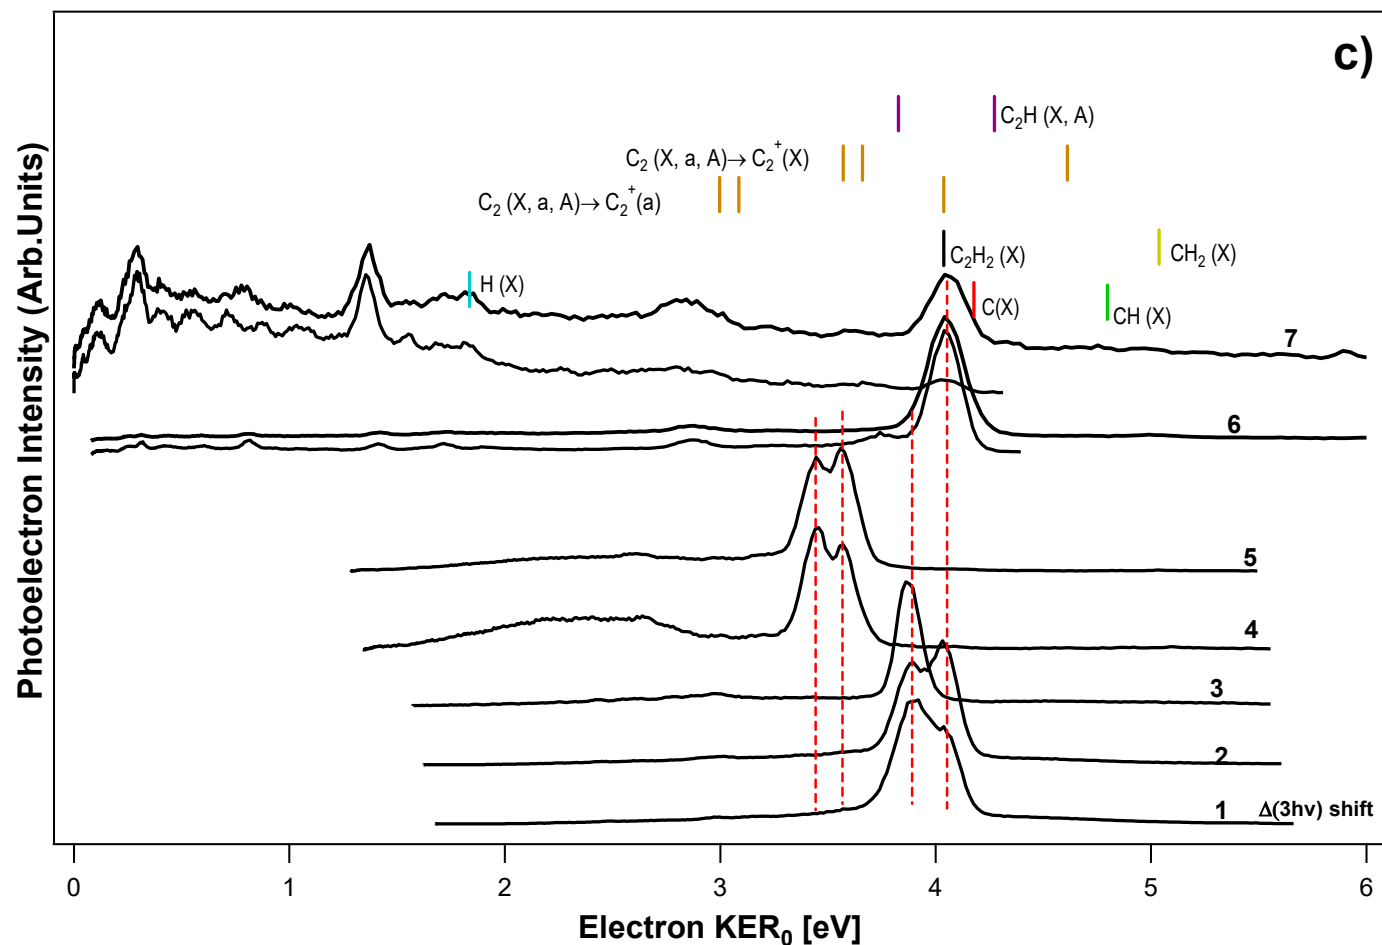

**Fig. S3 (c), Electron KERs and energy thresholds:** e-KERs derived from images no. 1 – 7 (Table S1) plotted as a function of the kinetic energy release (KER) for the no. 7 (KER<sub>0</sub>), shifted by three-photon energy differences, ( $\Delta(3h\nu)$ ) with respect to the “reference spectrum”, no. 7 (see main text). KER thresholds for ionization of fragments, as specified, are indicated by sticks above the spectra.



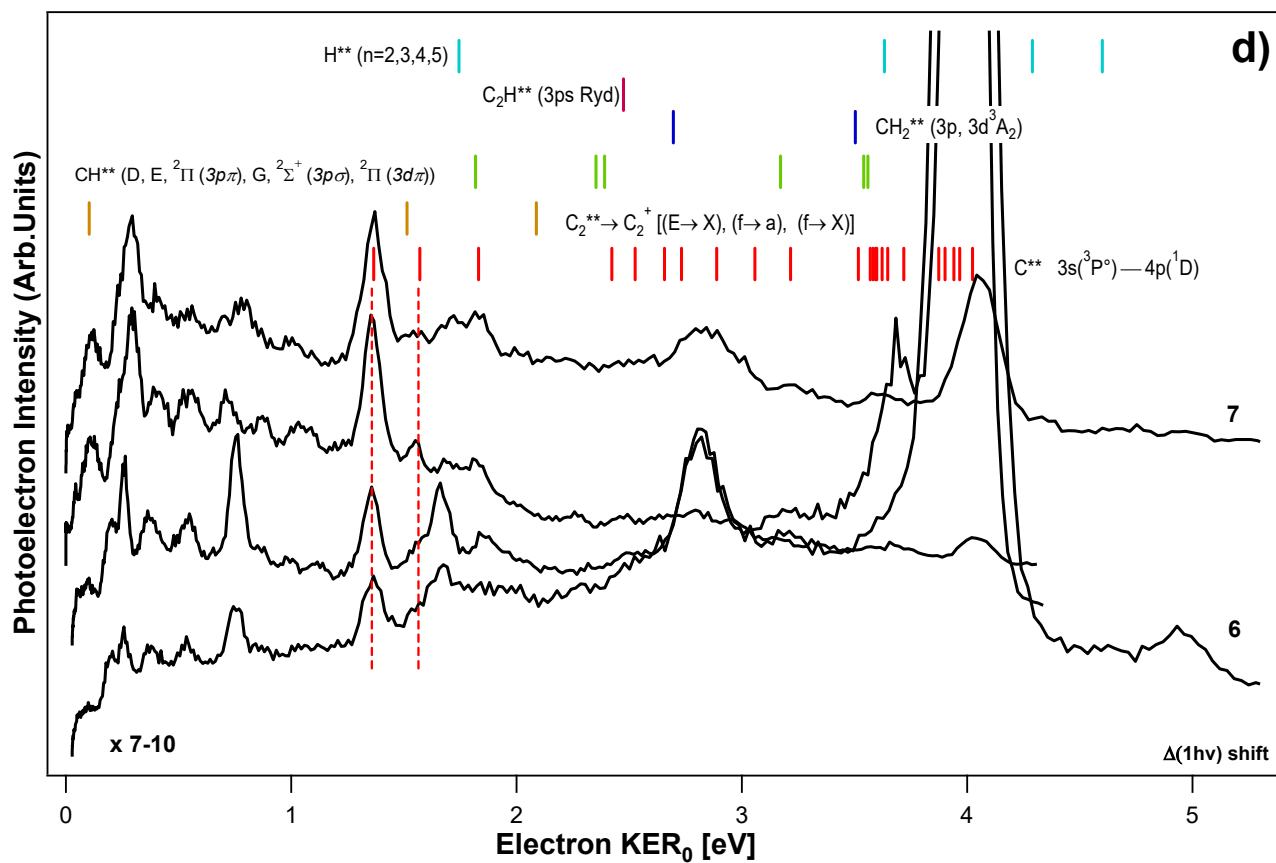

**Fig. S3 (d), Electron KERs and energy thresholds:** e-KERs derived from images no. 6-7 (**Table S1**) plotted as a function of the kinetic energy release (KER) for the no. 7 ( $KER_0$ ), shifted by one-photon energy differences, ( $\Delta(1h\nu)$ ) with respect to the “reference spectrum”, no. 7 (see main text). KER thresholds for ionization of fragments, as specified, are indicated by sticks above the spectra. The spectrum for no.6 is magnified by factors 7-10.

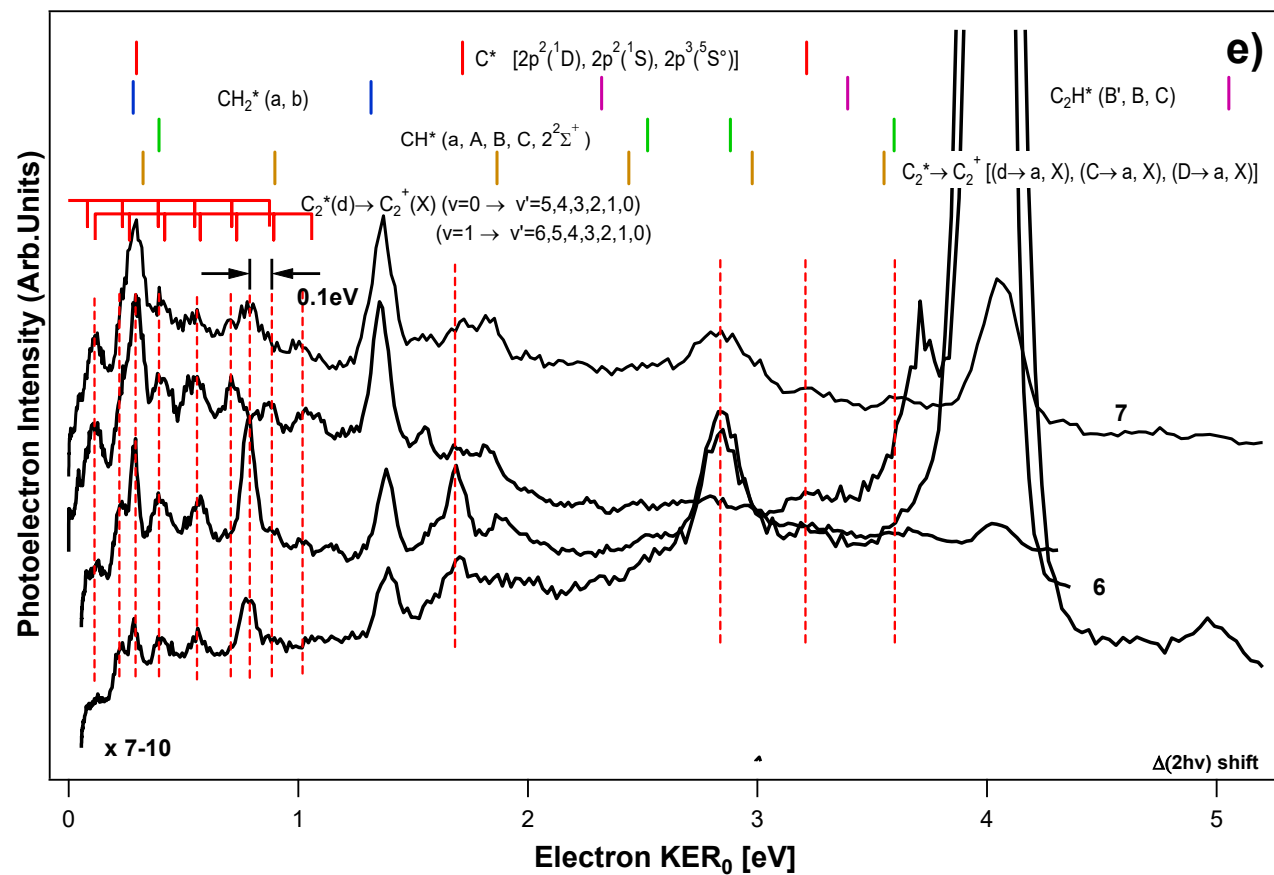

**Fig. S3 (e), Electron KERs and energy thresholds:** e-KERs derived from images no. 6-7 (Table S1) plotted as a function of the kinetic energy release (KER) for the no. 7 (KER<sub>0</sub>), shifted by two-photon energy differences,  $\Delta(2h\nu)$  with respect to the “reference spectrum”, no. 7 (see main text). KER thresholds for ionization of fragments, as specified, are indicated by sticks above the spectra. The spectrum for no.6 is magnified by factors 7-10.

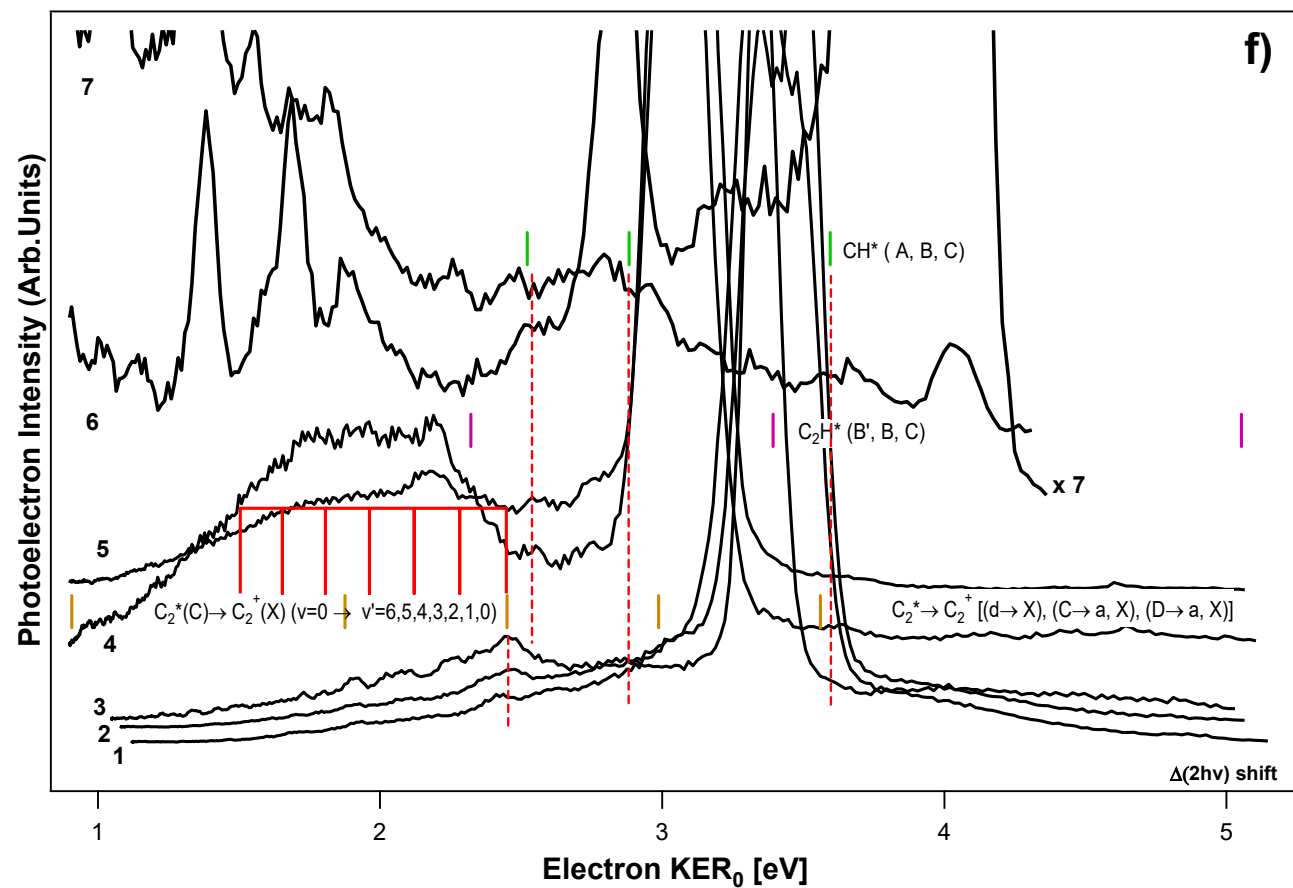

**Fig. S3 (f), Electron KERs and energy thresholds:** e-KERs derived from images no. 1-7 (**Table S1**) plotted as a function of the kinetic energy release (KER) for the no. 7 ( $KER_0$ ), shifted by two-photon energy differences,  $(\Delta(2h\nu))$  with respect to the “reference spectrum”, no. 7 (see main text). KER thresholds for ionization of fragments, as specified, are indicated by sticks. The spectrum for no.1-5 is magnified.

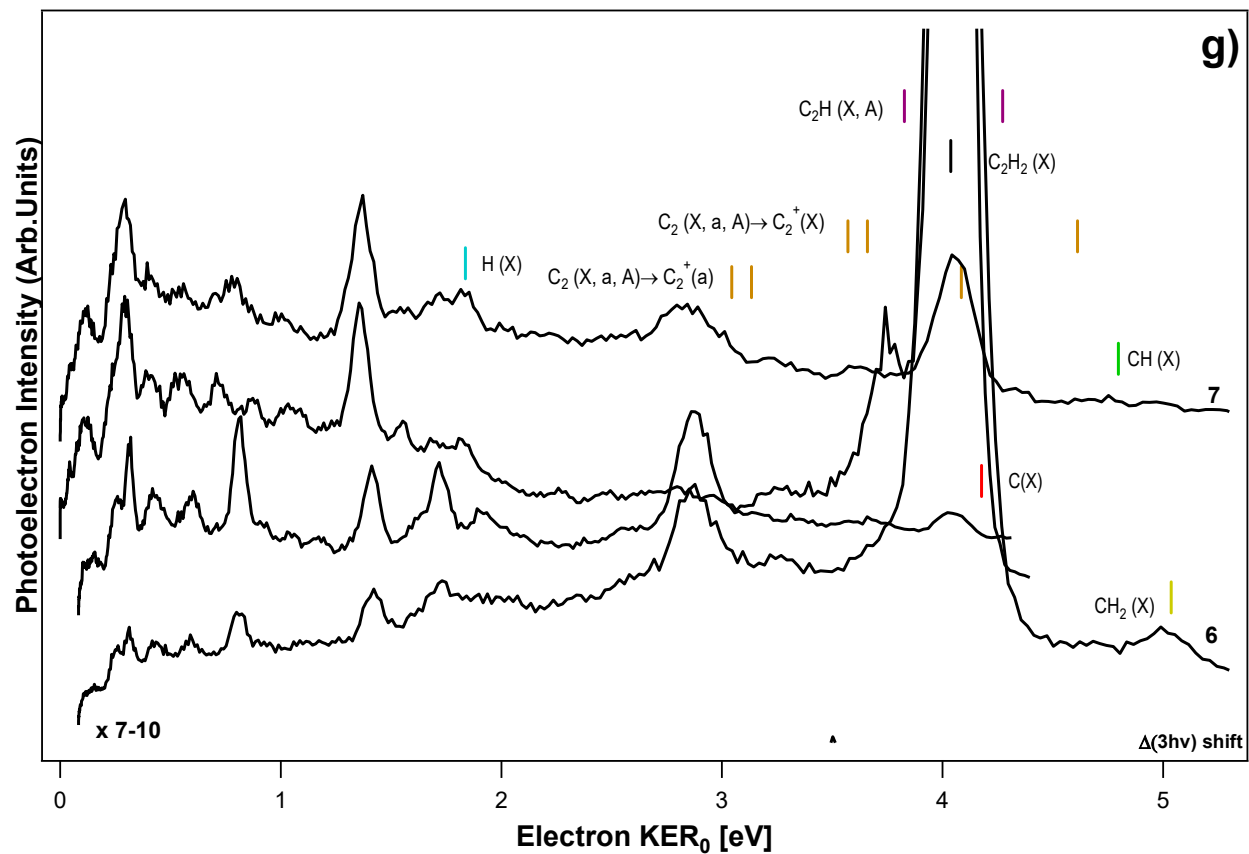

**Fig. S3 (g), Electron KERs and energy thresholds:** e-KERs derived from images no. 6-7 (Table S1) plotted as a function of the kinetic energy release (KER) for the no. 7 ( $KER_0$ ), shifted by three-photon energy differences, ( $\Delta(3h\nu)$ ) with respect to the “reference spectrum”, no. 7 (see main text). KER thresholds for ionization of fragments, as specified, are indicated by sticks. The spectrum for no.6 is magnified as indicated.

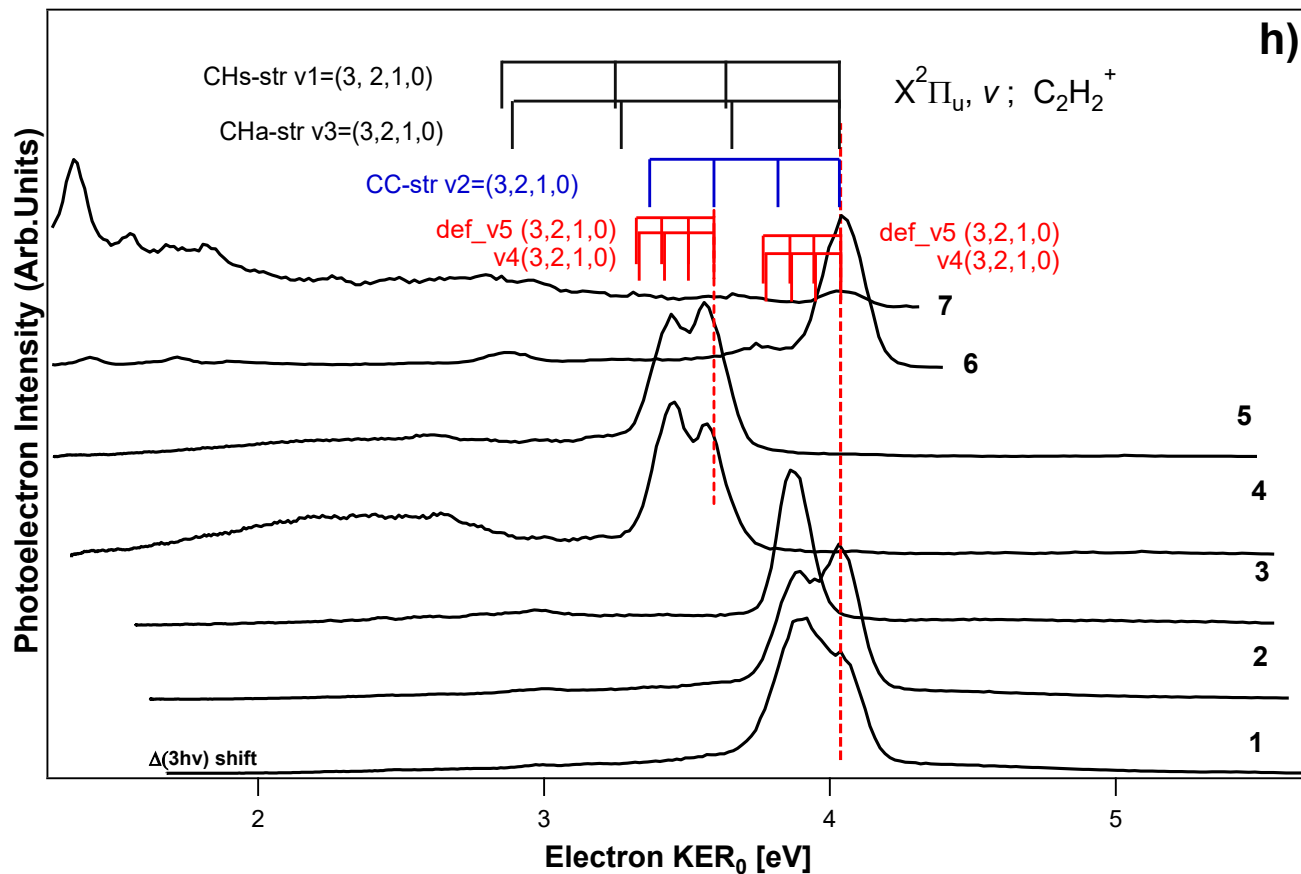

**Fig. S3 (h), Electron KERs and energy thresholds:** e-KERs derived from images no. 1-7 (Table S1) plotted as a function of the kinetic energy release (KER) for the no. 7 ( $KER_0$ ), shifted by three-photon energy differences, ( $\Delta(3h\nu)$ ) with respect to the “reference spectrum”, no. 7 (see main text). KER thresholds for autoionization of superexcited  $C_2H_2$ , ( $C_2H_2^\#$ ), as specified, are indicated by sticks above the spectra.

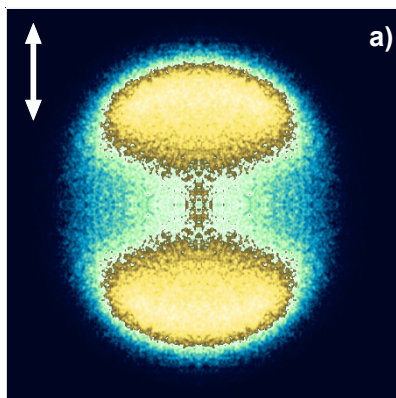

No.1

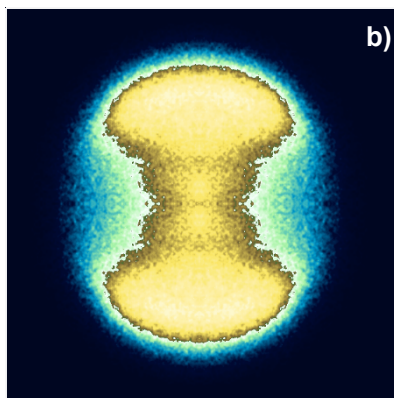

No.2

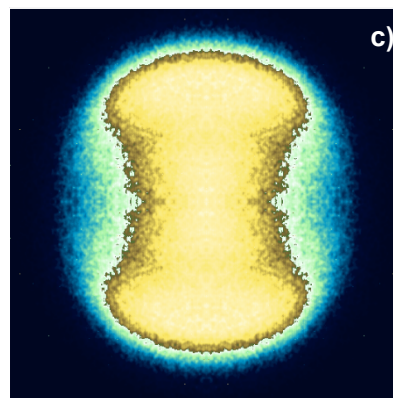

No.4

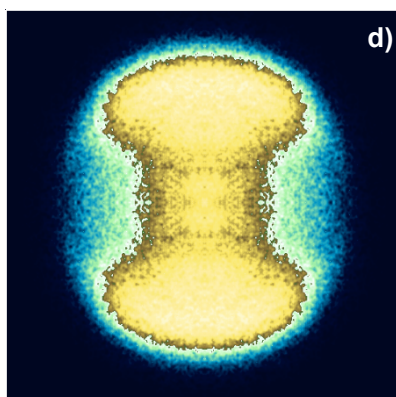

No.5

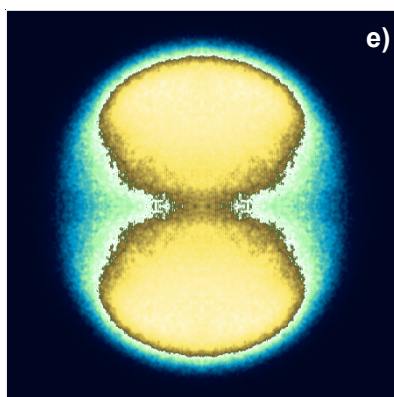

No.6

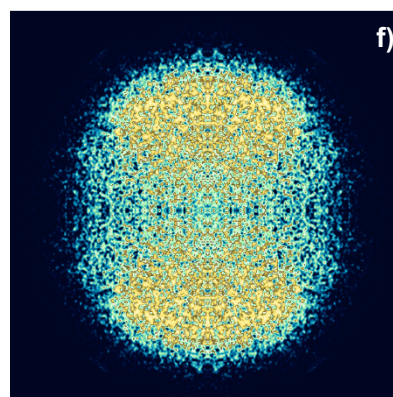

No.7

**Fig. S4, H<sup>+</sup> ion images:** Images recorded for the excitation no.1-2 and 4-7 as specified in **Table S1**. The laser polarization is indicated by a double arrow in (a).

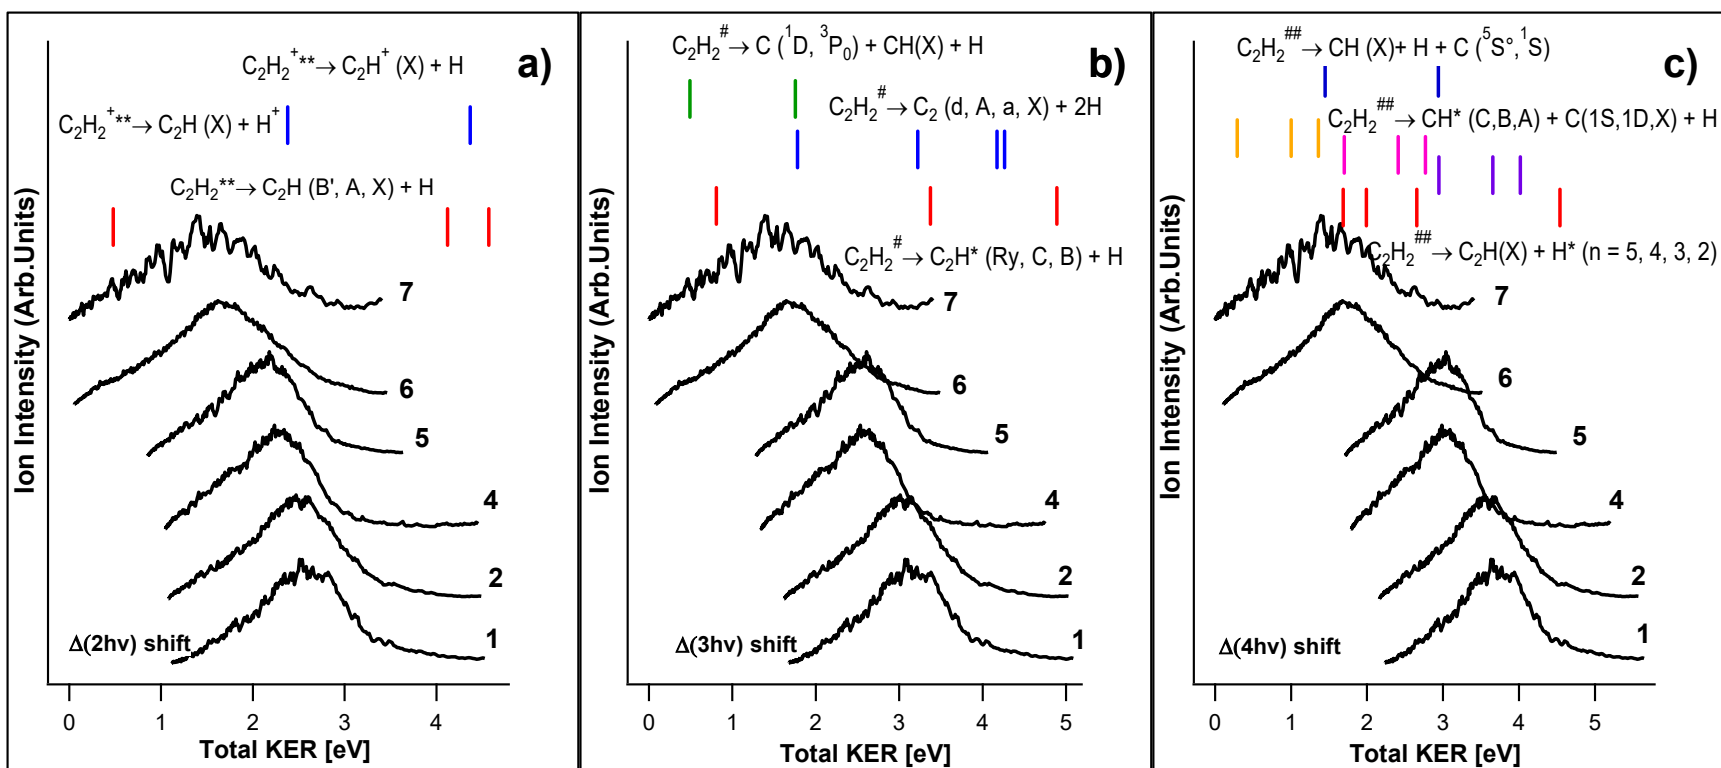

**Fig. S5, H<sup>+</sup> kinetic energy release spectra (KERS):** Ion kinetic energy release spectra (Ion-KERS) derived from the images no.1,2,4 - 7 (see **Table S1**). The spectra are plotted as a function of the total kinetic energy release for the no. 7 (Total KER<sub>0</sub>) and shifted by n-photon energy differences ( $\Delta(nh\nu)$ ) with respect to the “reference spectrum”, no. 7 (see main text) as,  $\Delta(2h\nu)$  (a),  $\Delta(3h\nu)$  (b) and  $\Delta(4h\nu)$  (c). KER thresholds for fragment formations by n-photo-dissociation (n = 2, 3 and 4 for photodissociation or autoionization via the  $C_2H_2^{**}$ ,  $C_2H_2^{\#}$  and  $C_2H_2^{\#\#}$  intermediate species; see main text), as specified, are indicated by sticks above the spectra.

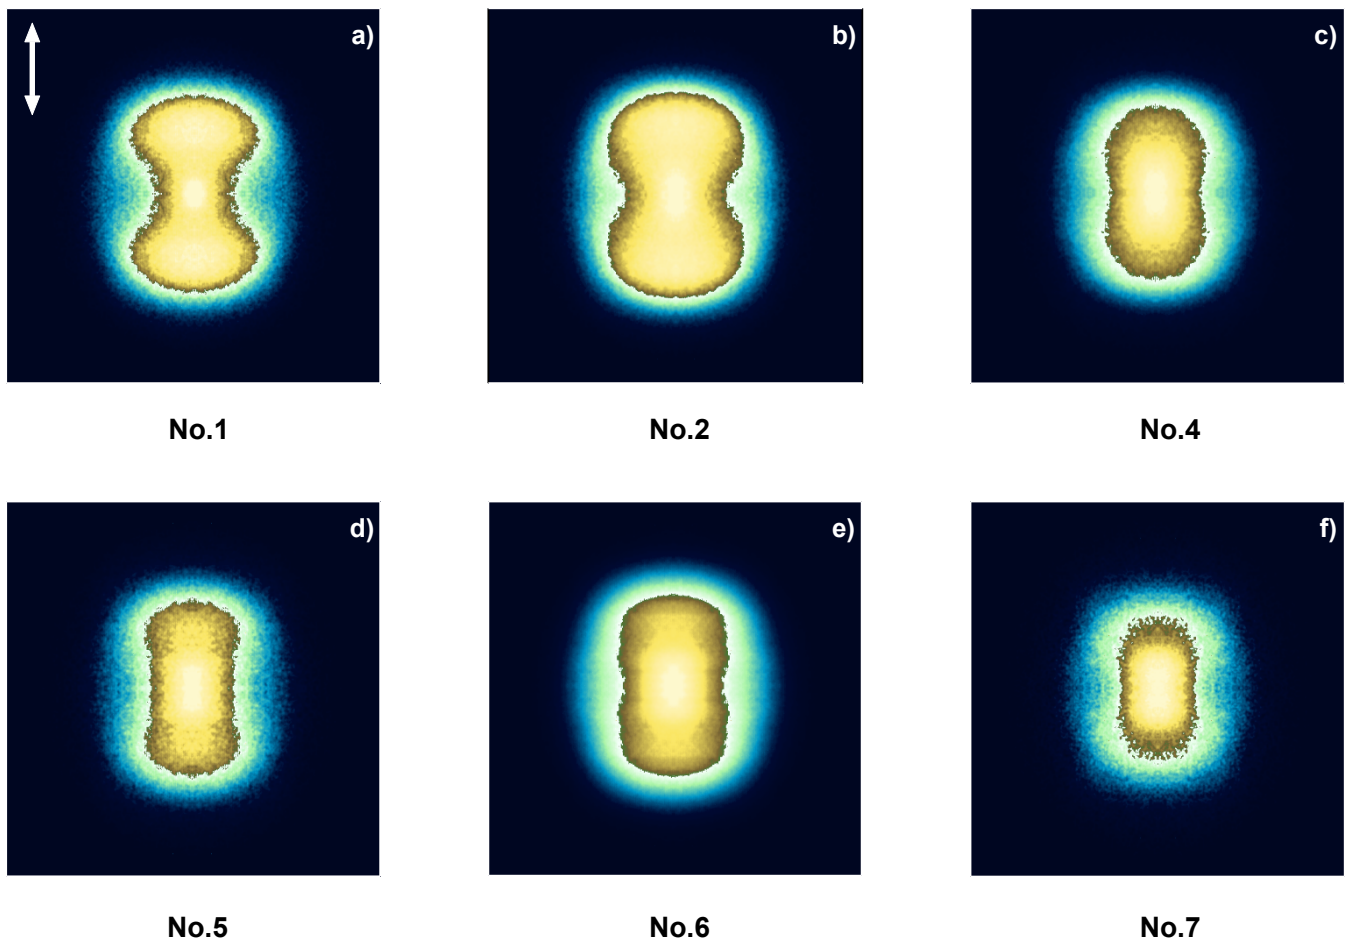

**Fig. S6, C<sup>+</sup> ion images:** Images recorded for the excitation no.1-2 and 4-7 as specified in **Table S1**. The laser polarization is indicated by a double arrow in (a).



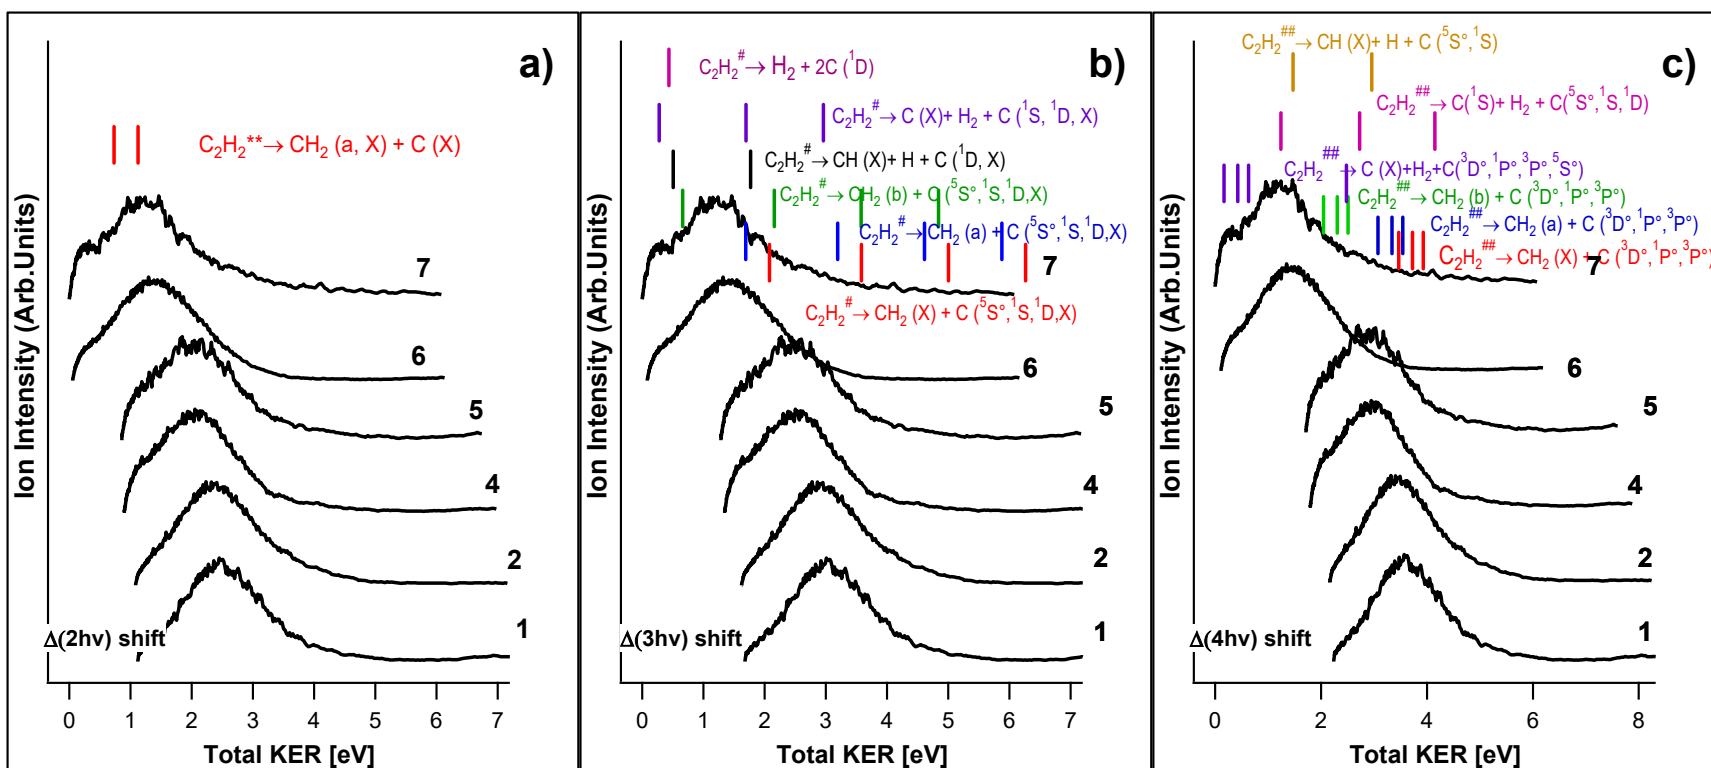

**Fig. S7, C<sup>+</sup> kinetic energy release spectra (KERs):** Ion kinetic energy release spectra (Ion-KERs) derived from the images no.1,2,4 - 7 (see **Table S1**). The spectra are plotted as a function of the total kinetic energy release for the no. 7 (Total KER<sub>0</sub>) and shifted by n-photon energy differences ( $\Delta(nh\nu)$ ) with respect to the “reference spectrum”, no. 7 (see main text) as,  $\Delta(2h\nu)$  (a),  $\Delta(3h\nu)$  (b) and  $\Delta(4h\nu)$  (c). KER thresholds for fragment formations by n-photo-dissociation (n = 2, 3 and 4 for photodissociation via the C<sub>2</sub>H<sub>2</sub><sup>\*\*</sup>, C<sub>2</sub>H<sub>2</sub><sup>#</sup> and C<sub>2</sub>H<sub>2</sub><sup>##</sup> intermediate species; see main text), as specified, are indicated by sticks above the spectra.

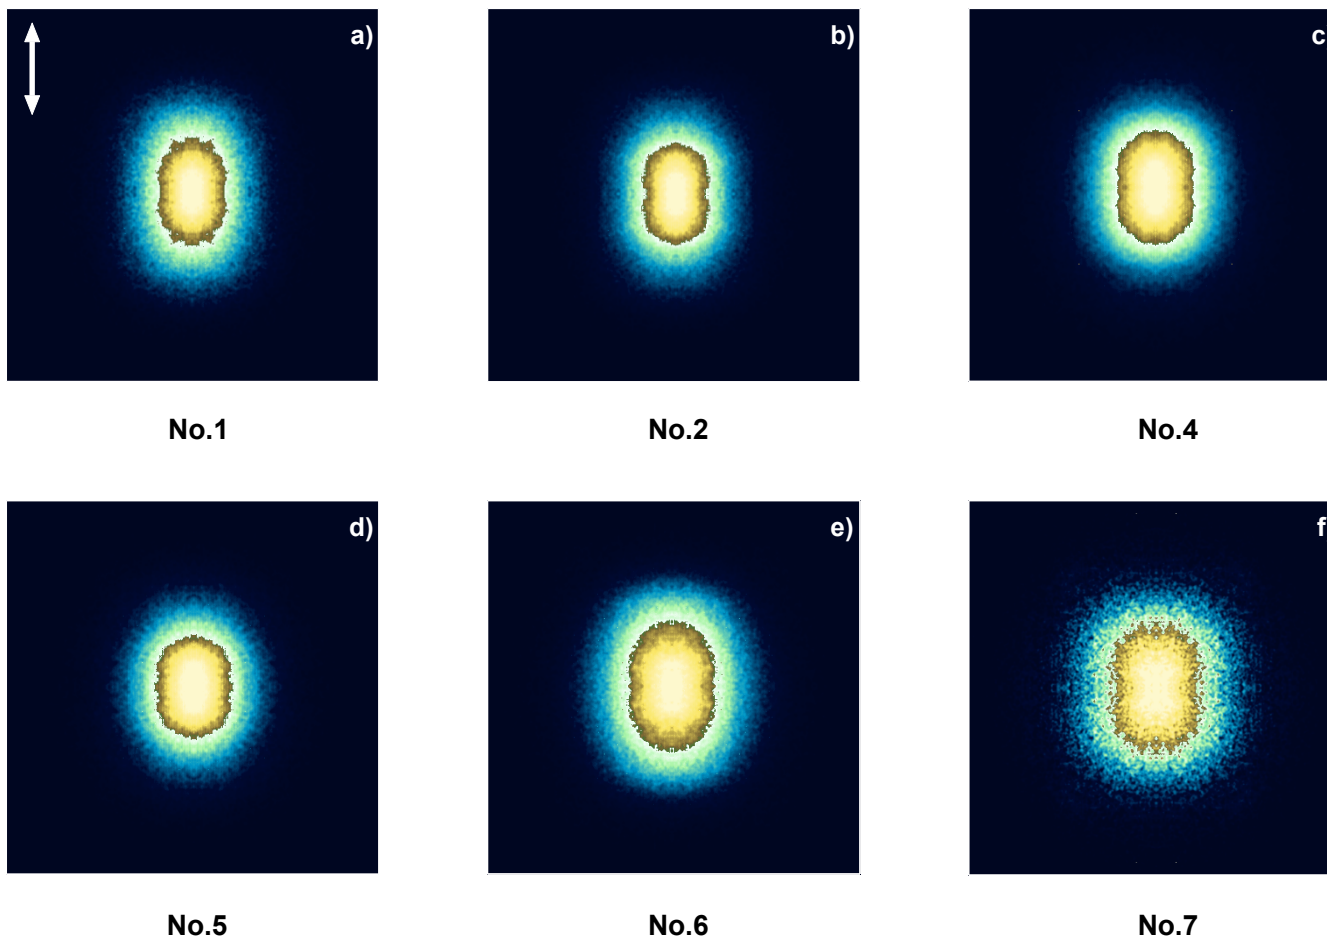

**Fig. S8, CH<sup>+</sup> ion images:** Images recorded for the excitation no.1-2 and 4-7 as specified in **Table S1**. The laser polarization is indicated by a double arrow in (a).

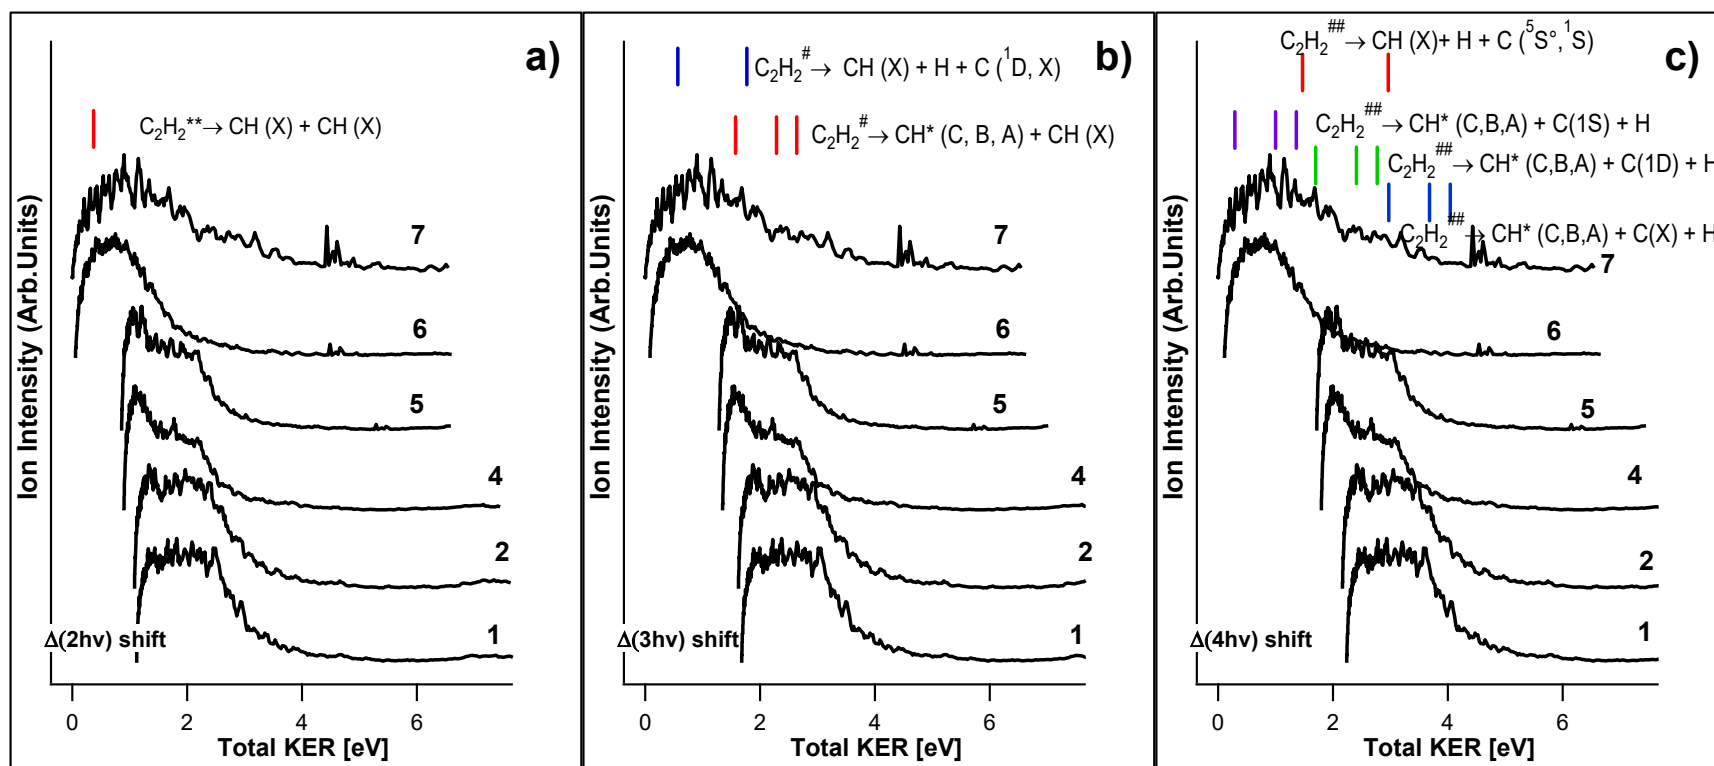

**Fig. S9, CH<sup>+</sup> kinetic energy release spectra (KERs):** Ion kinetic energy release spectra (Ion-KERs) derived from the images no.1,2,4-7 (see **Table S1**). The spectra are plotted as a function of the total kinetic energy release for the no. 7 (Total KER<sub>0</sub>) and shifted by n-photon energy differences ( $\Delta(nh\nu)$ ) with respect to the “reference spectrum”, no. 7 (see main text) as,  $\Delta(2h\nu)$  (a),  $\Delta(3h\nu)$  (b) and  $\Delta(4h\nu)$  (c). KER thresholds for fragment formations by n-photo-dissociation (n = 2, 3 and 4 for photodissociation via the C<sub>2</sub>H<sub>2</sub><sup>\*\*</sup>, C<sub>2</sub>H<sub>2</sub><sup>#</sup> and C<sub>2</sub>H<sub>2</sub><sup>##</sup> intermediate species; see main text), as specified, are indicated by sticks above the spectra.

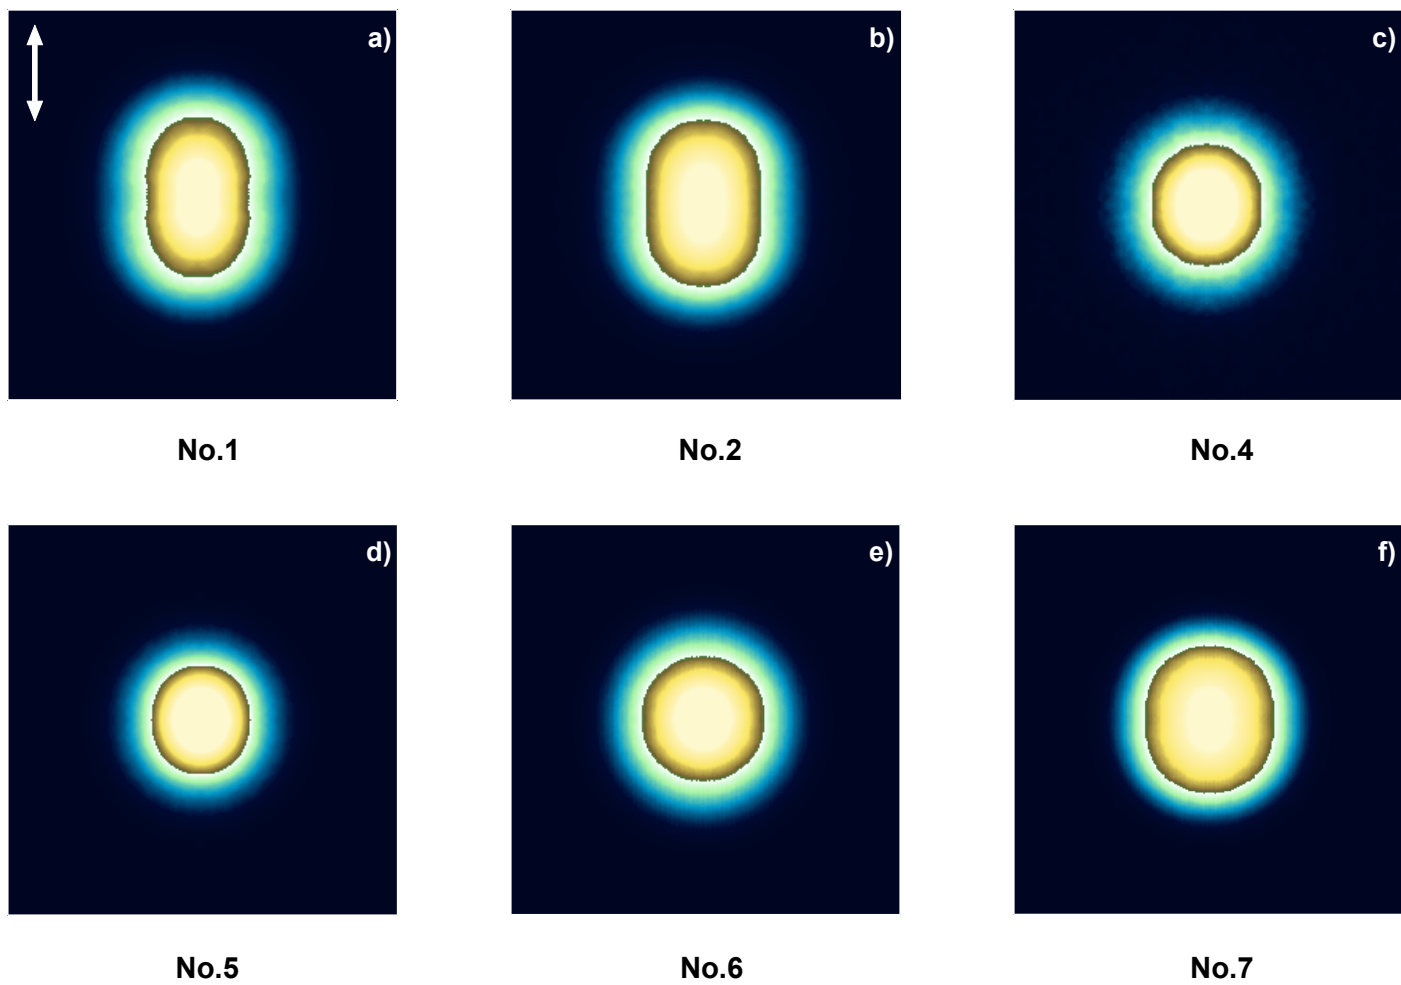

**Fig. S10,  $C_2^+$  ion images:** Images recorded for the excitation no.1-2 and 4-7 as specified in **Table S1**. The laser polarization is indicated by a double arrow in (a).

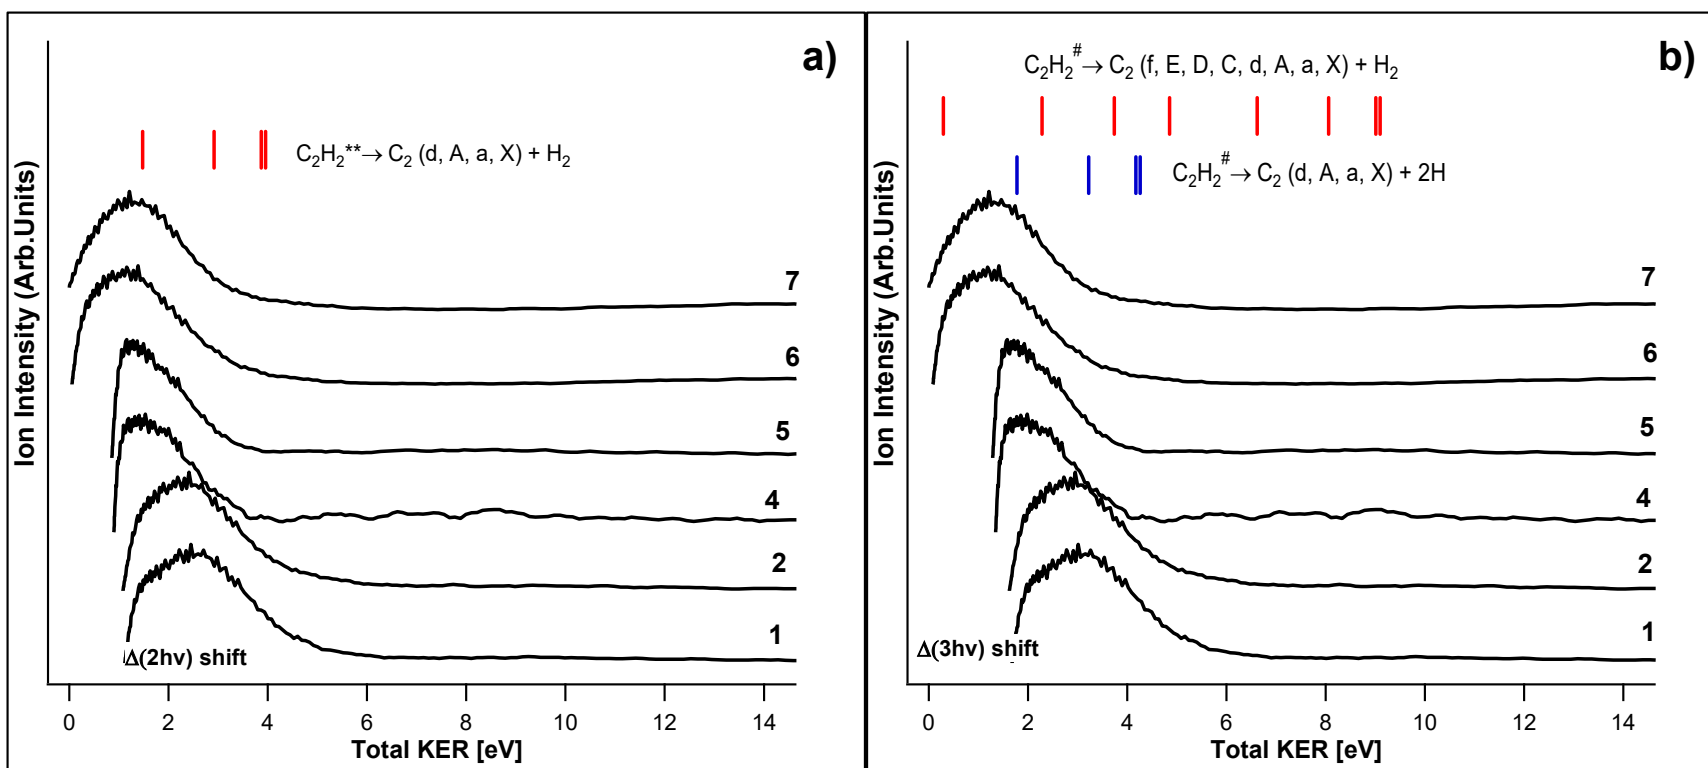

**Fig. S11,  $C_2^+$  kinetic energy release spectra (KERs):** Ion kinetic energy release spectra (Ion-KERs) derived from the images no.1,2,4-7 (see **Table S1**). The spectra are plotted as a function of the total kinetic energy release for the no. 7 ( $Total\ KER_0$ ) and shifted by  $n$ -photon energy differences ( $\Delta(nhv)$ ) with respect to the “reference spectrum”, no. 7 (see main text) as,  $\Delta(2hv)$  (a) and  $\Delta(3hv)$  (b). KER thresholds for fragment formations by  $n$ -photo-dissociation ( $n = 2$  and  $3$  for photodissociation via the  $C_2H_2^{**}$  and  $C_2H_2^\#$  intermediate species; see main text), as specified, are indicated by sticks above the spectra.

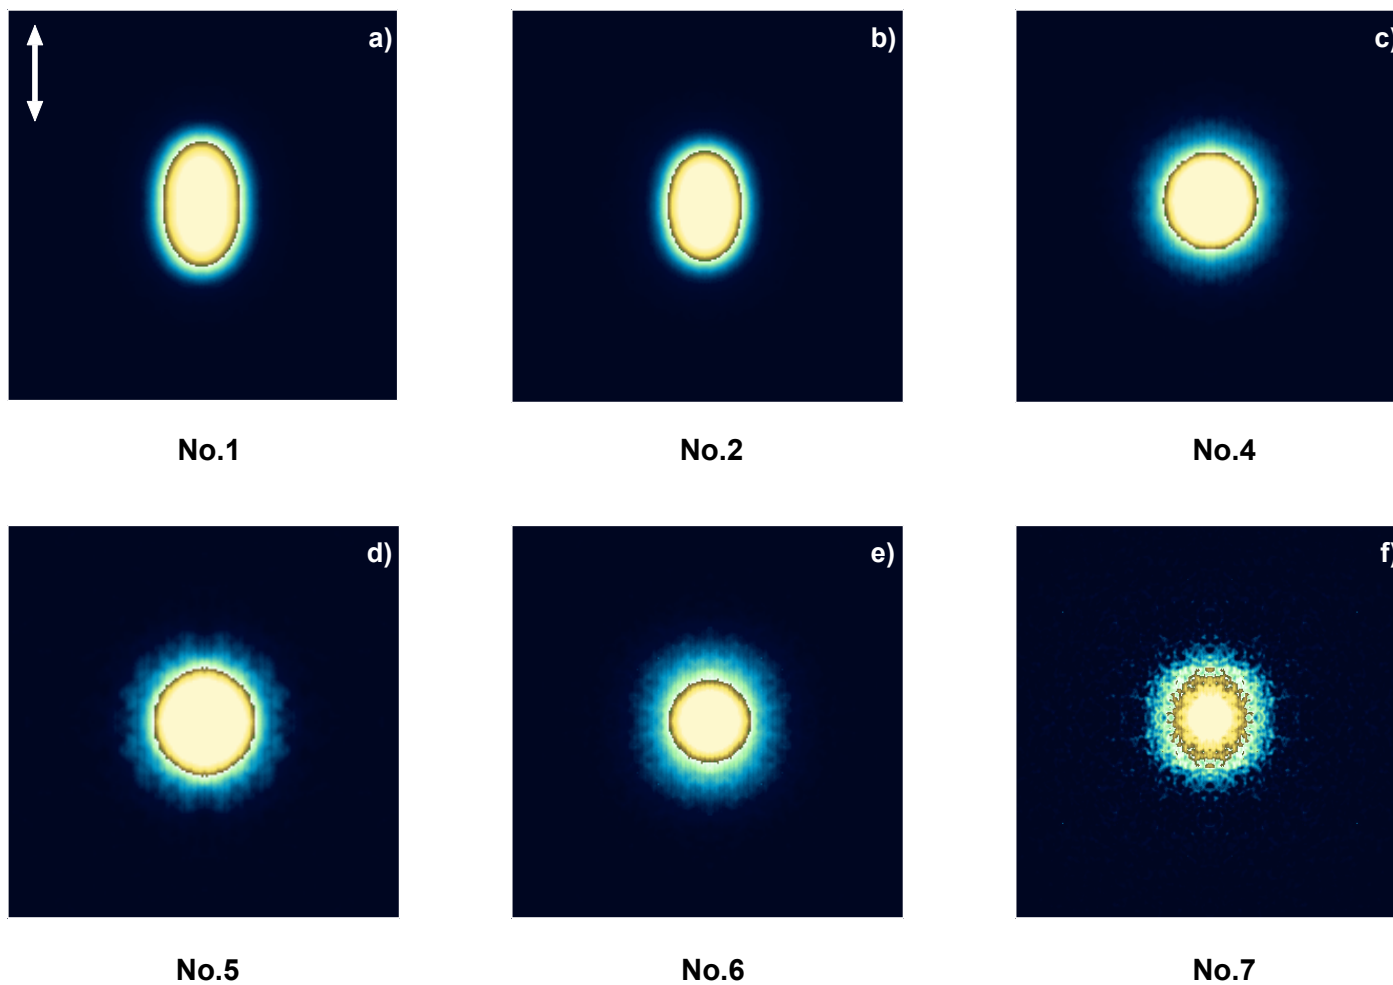

**Fig. S12,  $C_2H^+$  ion images:** Images recorded for the excitation no.1-2 and 4-7 as specified in **Table S1**. The laser polarization is indicated by a double arrow in (a).

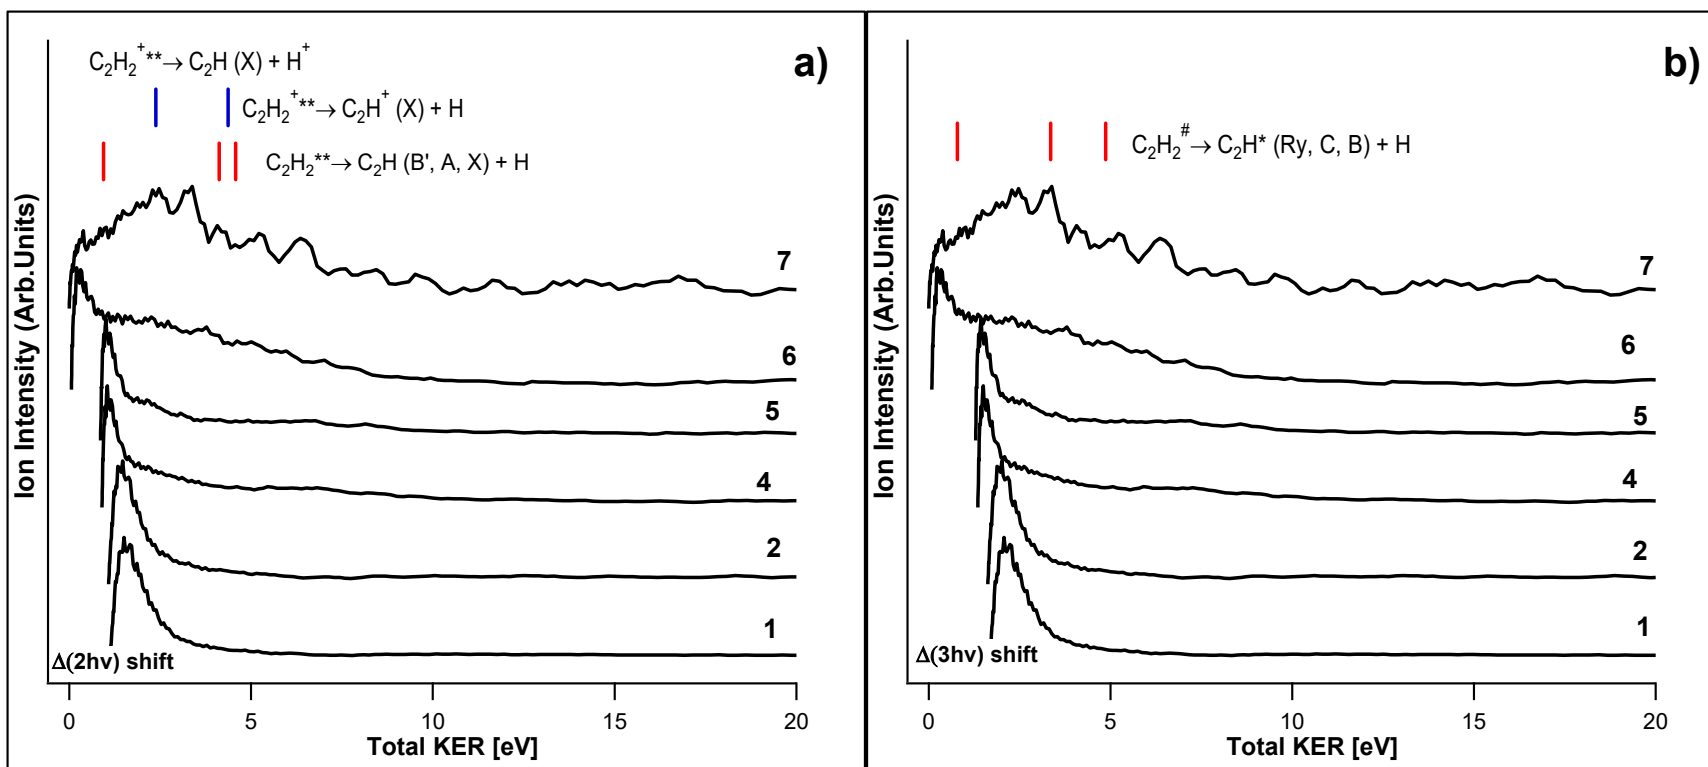

**Fig. S13,  $C_2H^+$  kinetic energy release spectra (KERs):** Ion kinetic energy release spectra (Ion-KERs) derived from the images no.1,2,4 -7 (see **Table S1**). The spectra are plotted as a function of the total kinetic energy release for the no. 7 (Total  $KER_0$ ) and shifted by  $n$ -photon energy differences ( $\Delta(nh\nu)$ ) with respect to the “reference spectrum”, no. 7 (see main text) as,  $\Delta(2h\nu)$  (a) and  $\Delta(3h\nu)$  (b). KER thresholds for fragment formations by  $n$ -photo-dissociation ( $n = 2$  and  $3$  for photodissociation via the  $C_2H_2^{**}$  and  $C_2H_2^\#$  intermediate species; see main text), as specified, are indicated by sticks above the spectra.

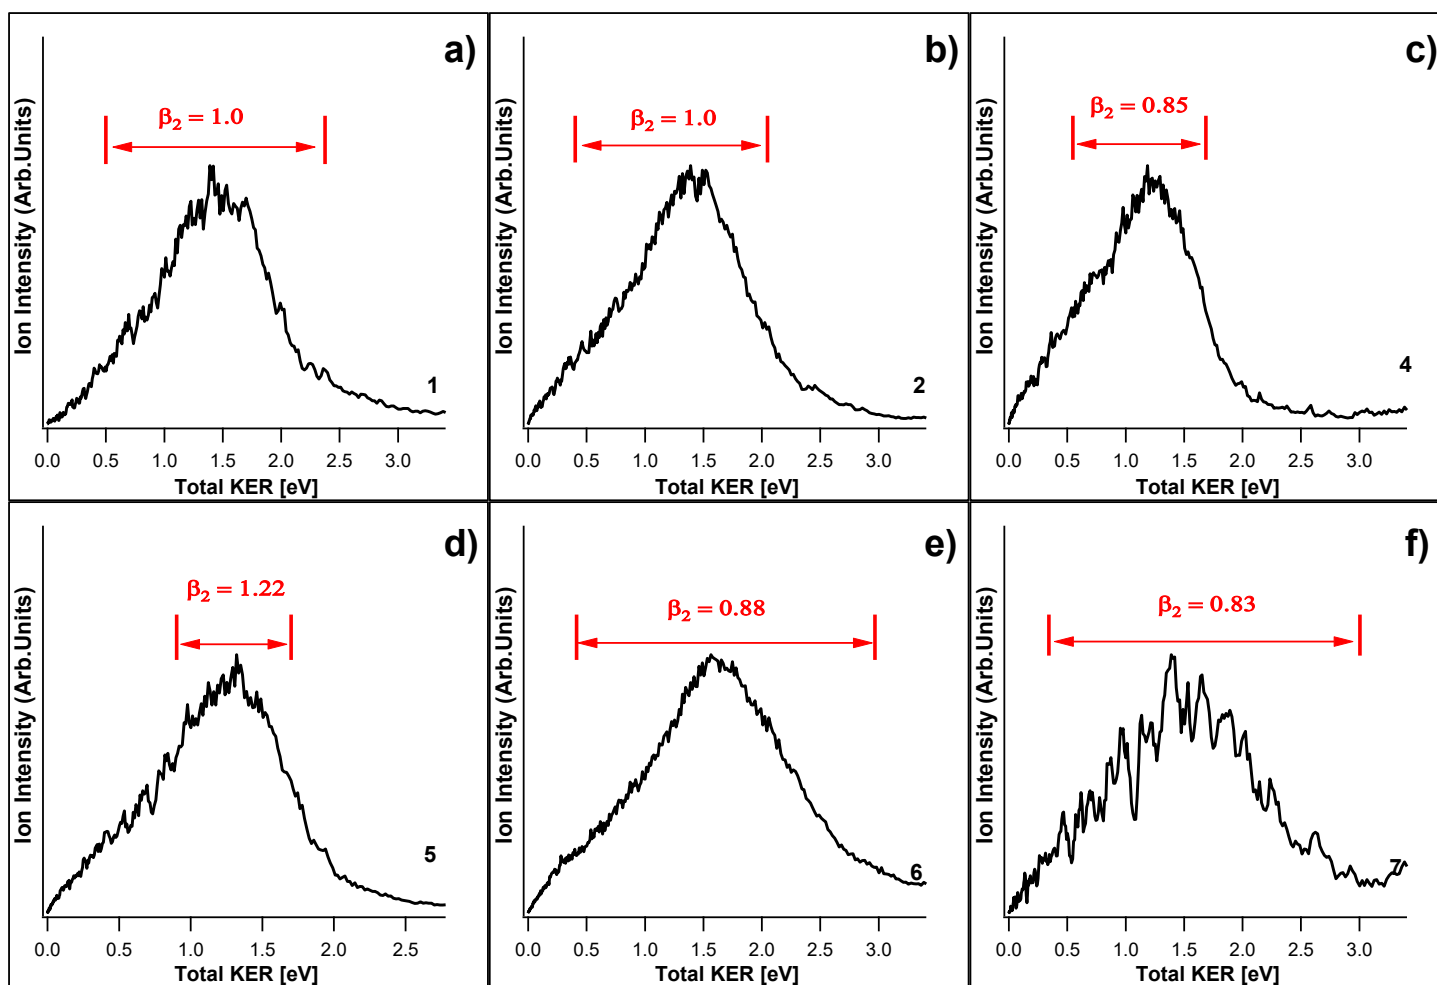

**Fig. S14,  $H^+$  angular distributions:**  $H^+$  KER spectra for images no. 1,2 and 4-7, average anisotropy /  $\beta_2$  parameters (see Table S2) and energy ranges used for the  $\beta_2$  determinations.



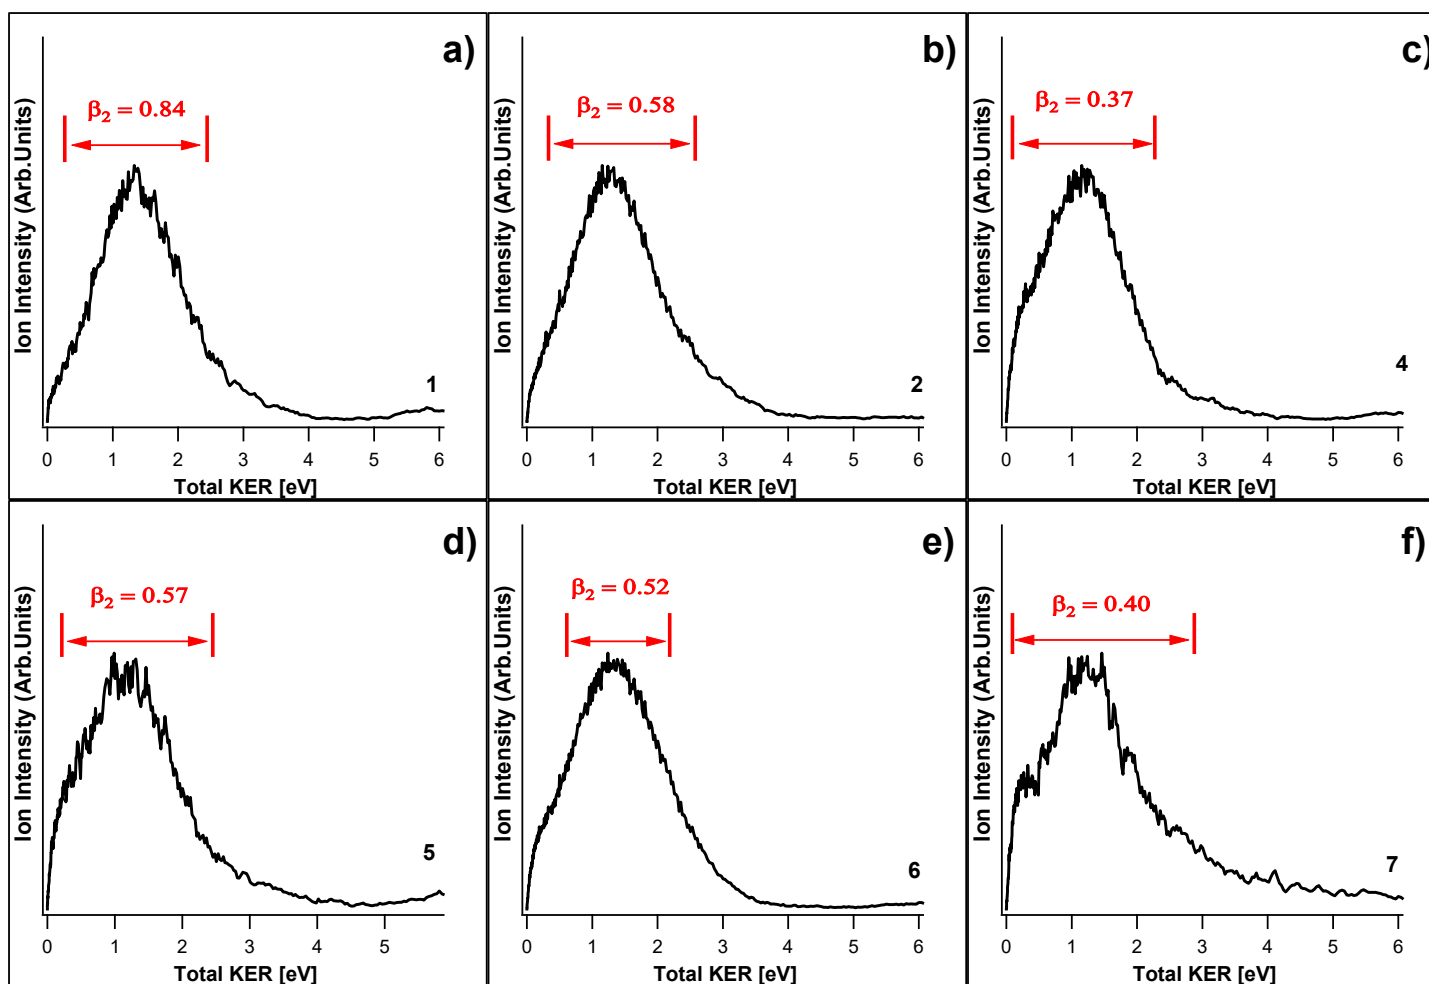

**Fig. S15,  $C^+$  angular distributions:**  $C^+$  KER spectra for images no. 1,2 and 4-7, average anisotropy /  $\beta_2$  parameters (see Table S2) and energy ranges used for the  $\beta_2$  determinations.

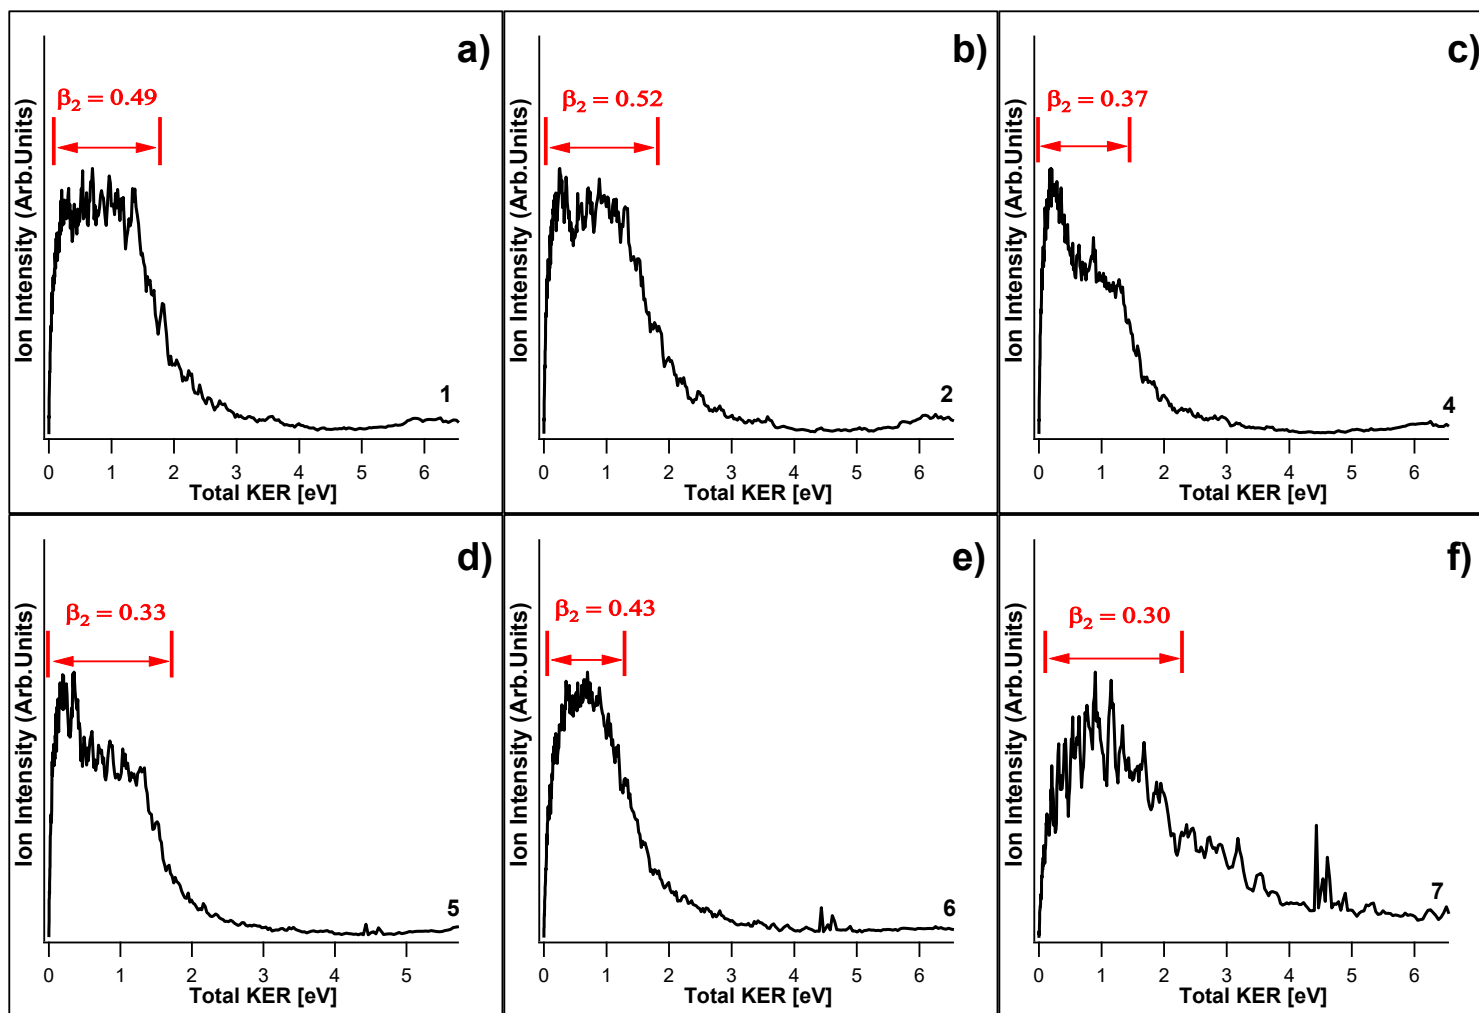

**Fig. S16,  $\text{CH}^+$  angular distributions:**  $\text{CH}^+$  KER spectra for images no. 1,2 and 4-7, average anisotropy /  $\beta_2$  parameters (see Table S2) and energy ranges used for the  $\beta_2$  determinations.

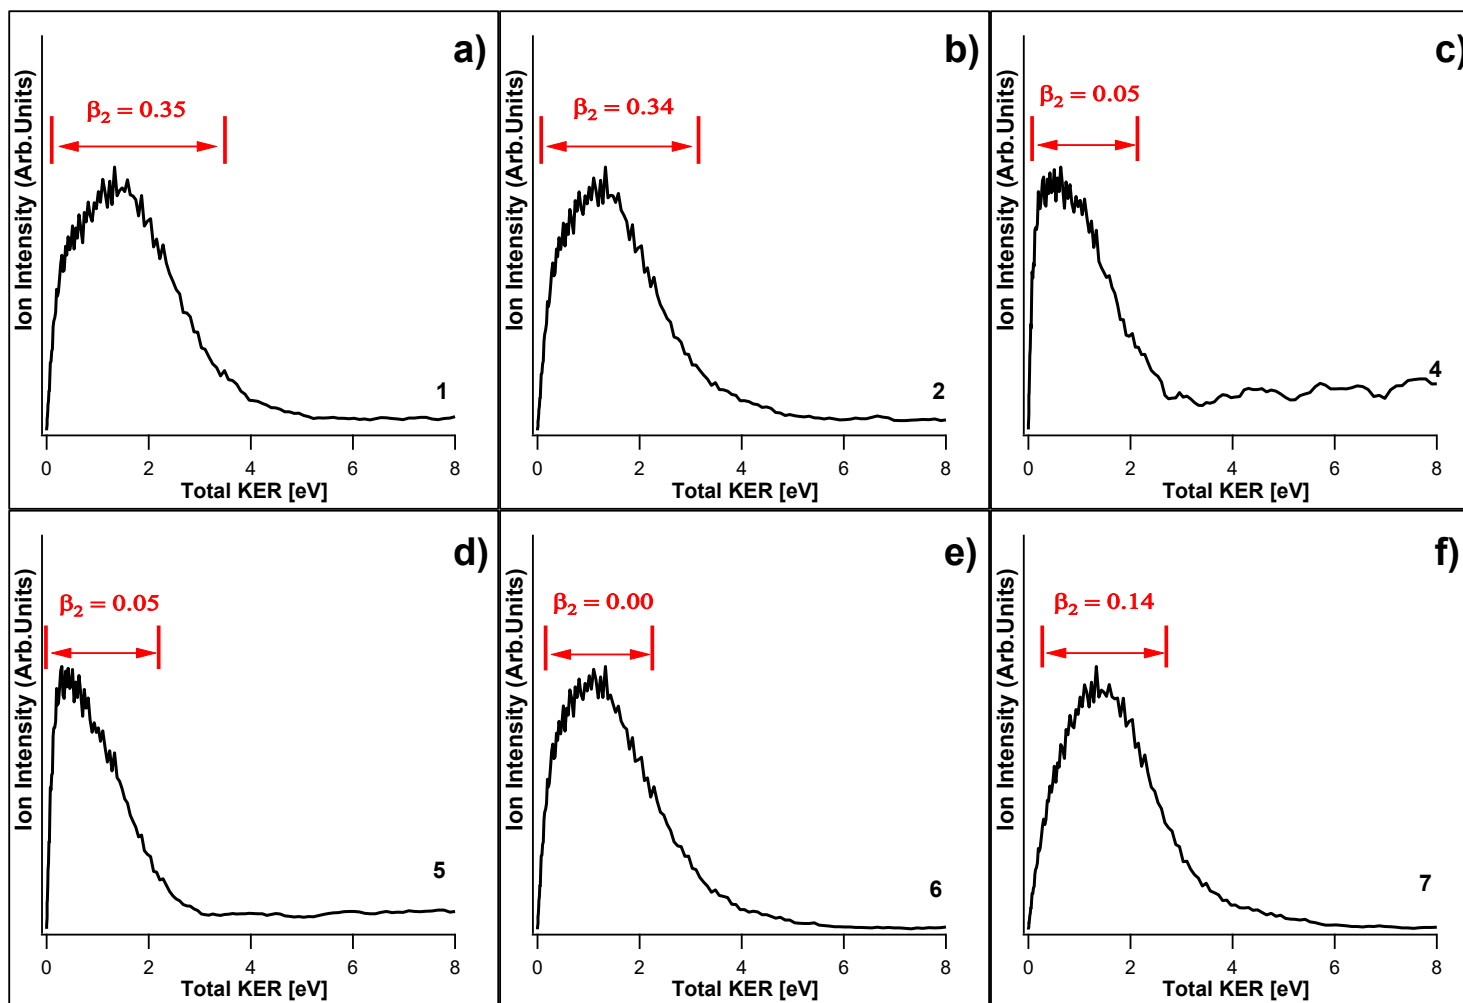

**Fig. S17,  $C_2^+$  angular distributions:**  $C_2^+$  KER spectra for images no. 1,2 and 4-7, average anisotropy /  $\beta_2$  parameters (see Table S2) and energy ranges used for the  $\beta_2$  determinations.

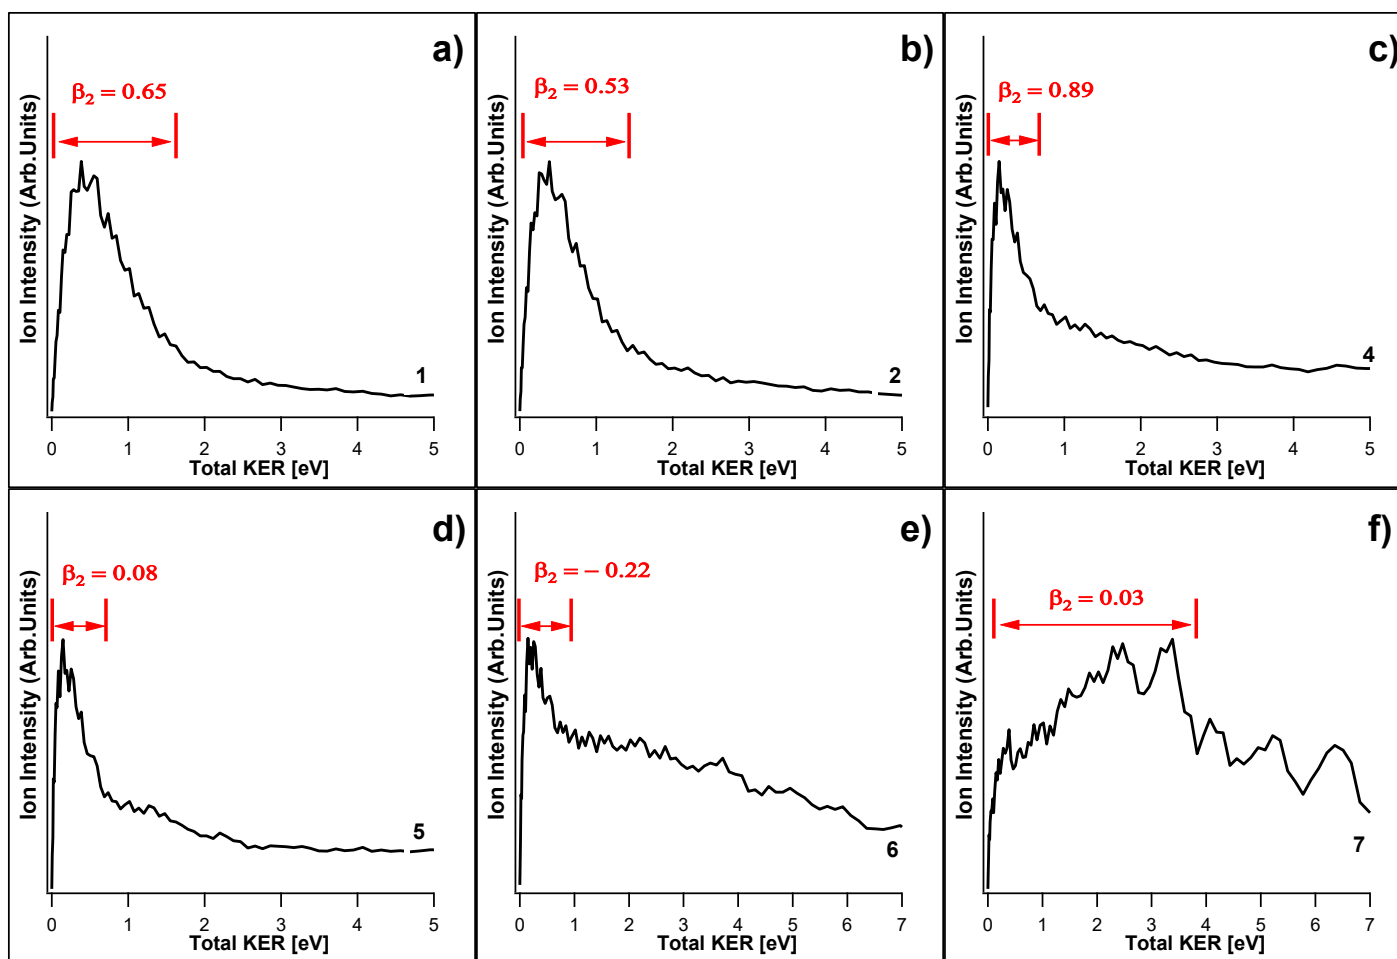

**Fig. S18,  $C_2H^+$  angular distributions:**  $C_2H^+$  KER spectra for images no. 1,2 and 4-7, average anisotropy /  $\beta_2$  parameters (see **Table S2**) and energy ranges used for the  $\beta_2$  determinations.

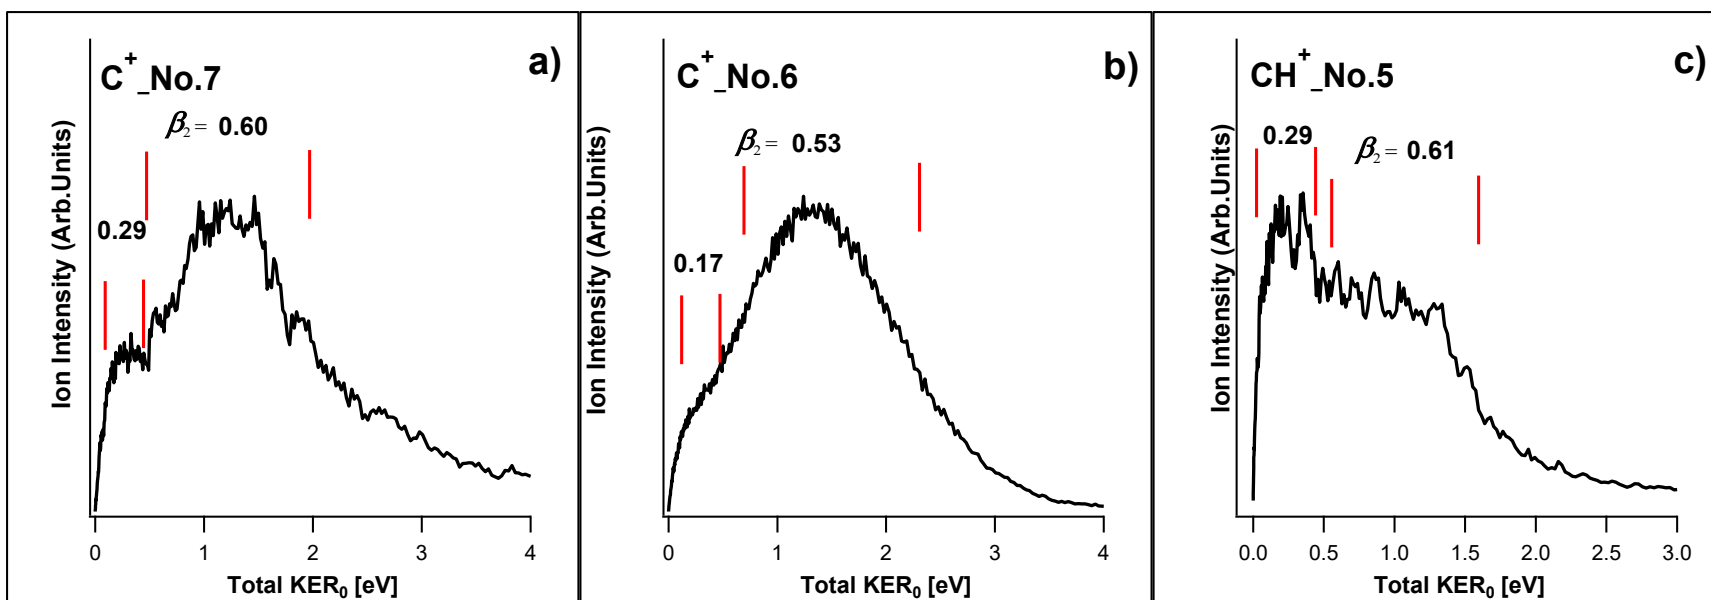

**Fig. S19, Ion angular distributions:** a) and b) C<sup>+</sup>KER spectra for images no. 7 and 6, c) CH<sup>+</sup>KER spectrum for image no.5 average anisotropy /  $\beta_2$  parameters and energy ranges used for the  $\beta_2$  determinations.

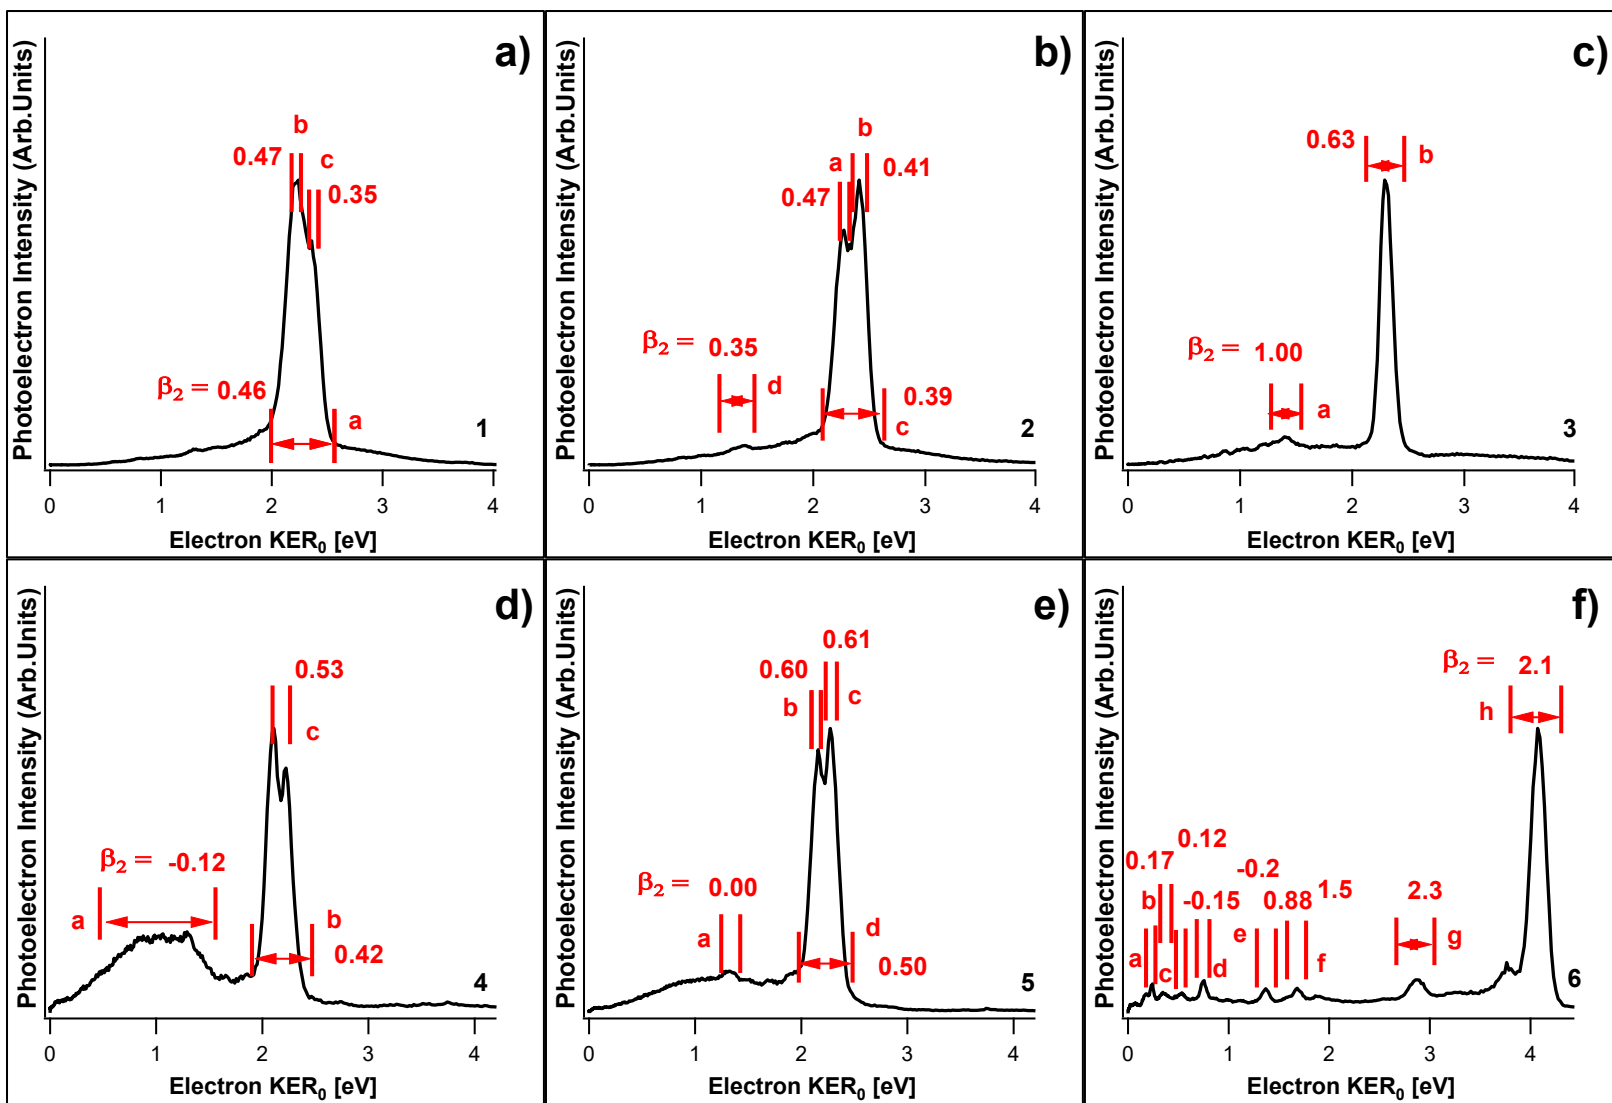

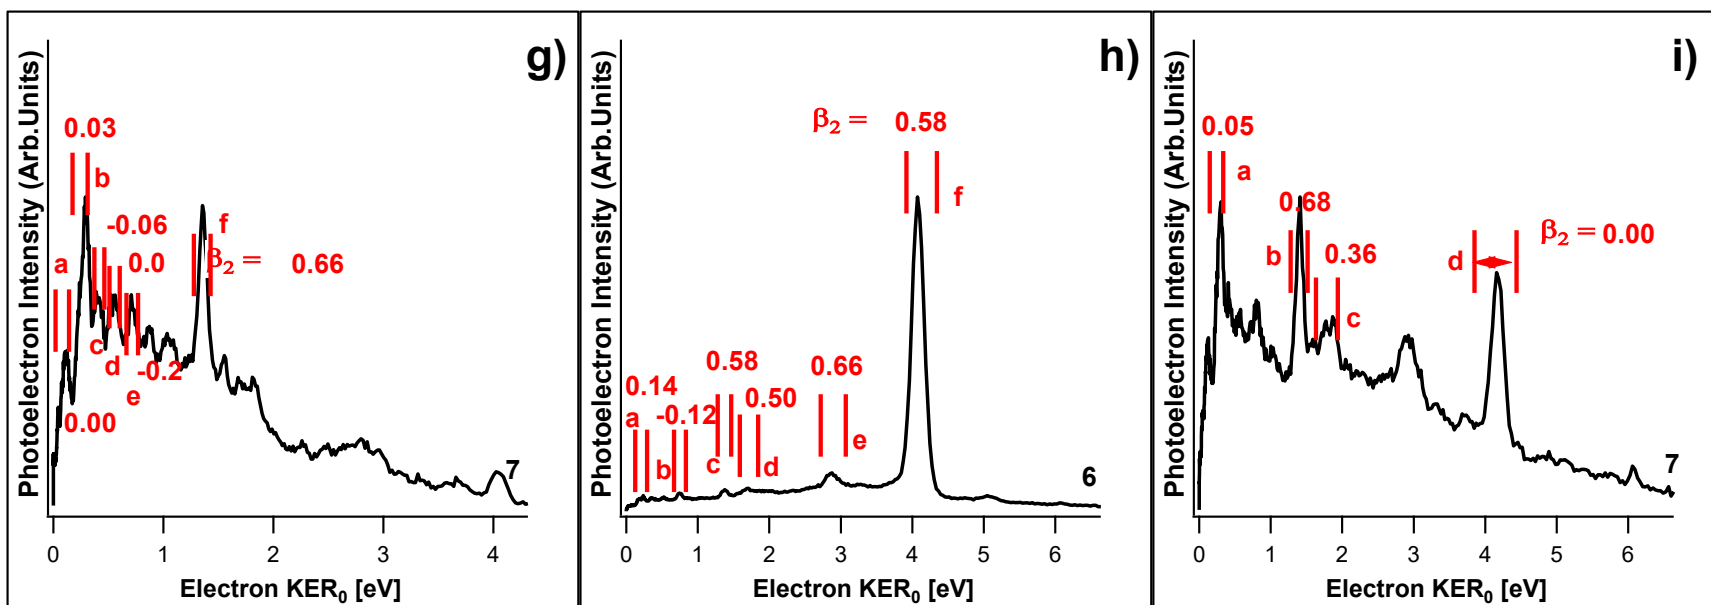

**Fig. S20, photoelectron angular distributions:** e-KER spectra for images no. 1-7, average anisotropy /  $\beta_2$  parameters (see Table S2) and energy ranges used for the  $\beta_2$  determinations. (f) and (h) recorded for repeller voltages of -3kV and -5kV, respectively for no.6 and (g) and (i) recorded for repeller voltages of -3kV and -5kV, respectively for no.7.

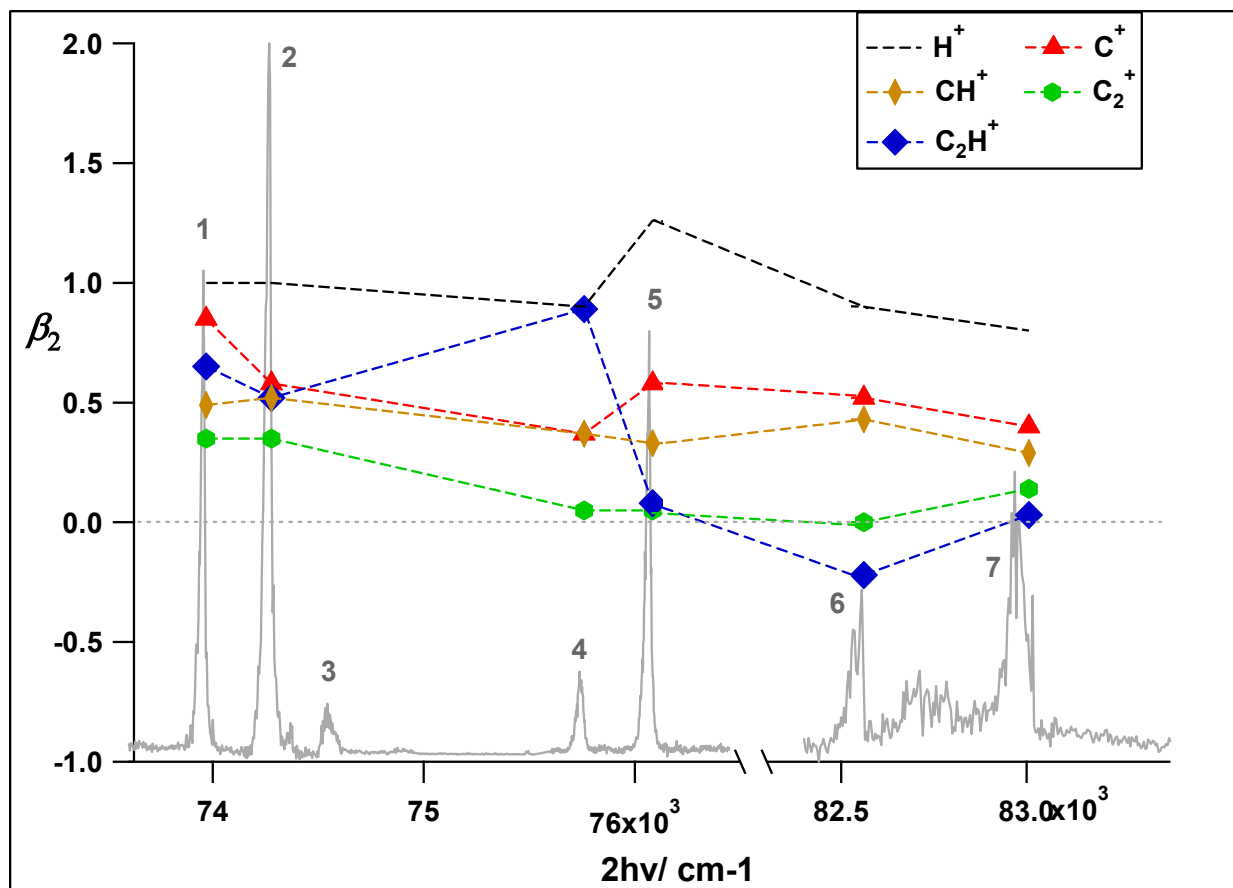

**Fig. S21,  $\beta_2$  parameters vs. ion images:** Average  $\beta_2$  parameters (Table S2) derived from ion images as a function of excitations (no. 1,2, 4-7; Table S1) and ions.



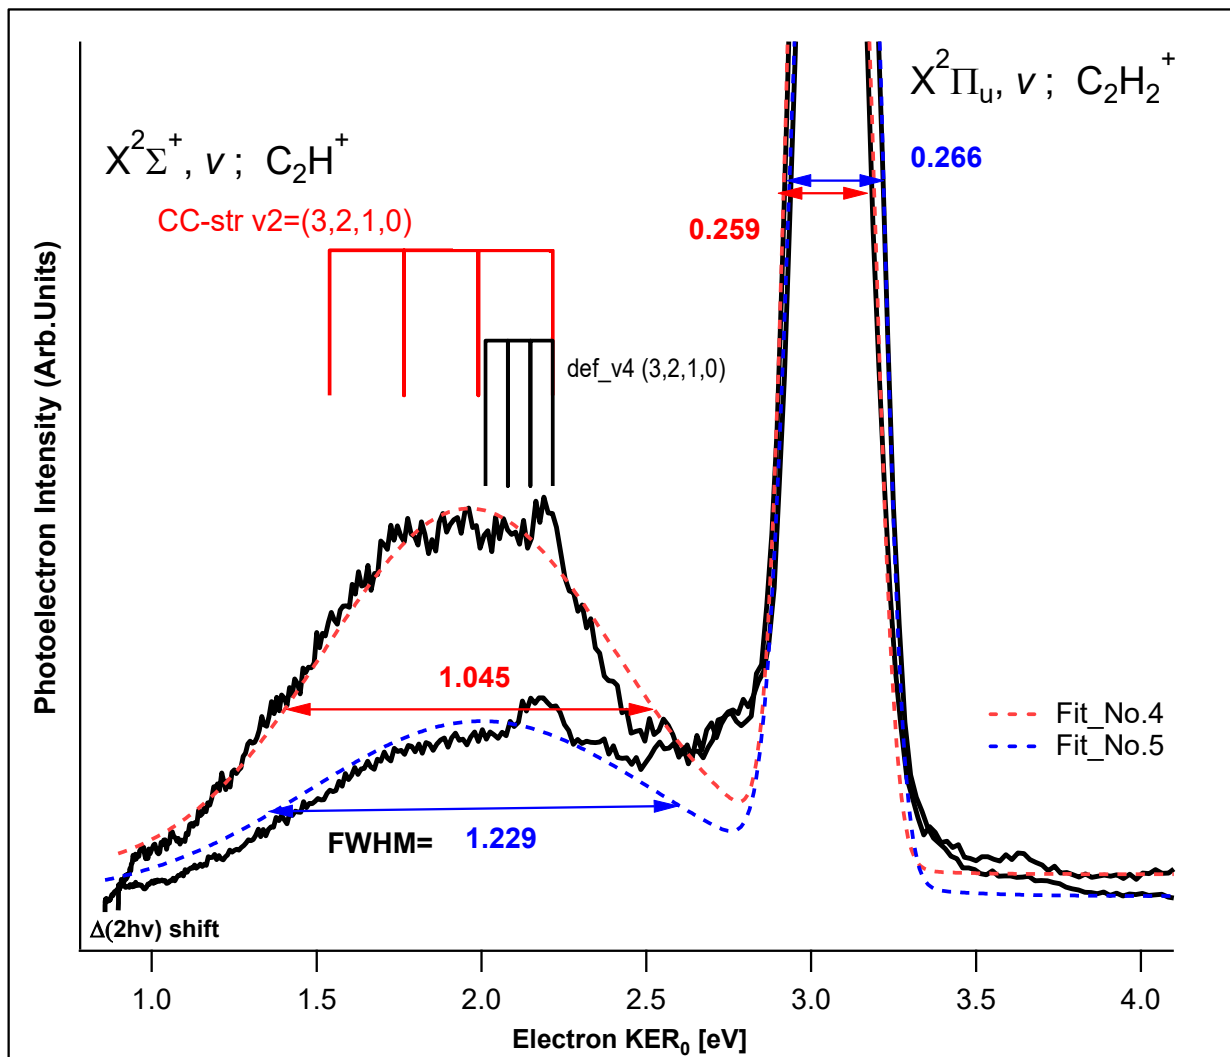

**Fig. S22, electron KERs for images no. 4-5 (Table S1):** e-KERs plotted as a function of the kinetic energy release (KER) for the no. 7 ( $KER_0$ ), shifted by two-photon energy differences, ( $\Delta(2h\nu)$ ) with respect to the “reference spectrum”, no. 7 (see main text). Full width at half maximum (FWHM) of broad spectra were determined, as indicated. KER thresholds for  $C_2H^+(X)$  vibrational mode formations, as specified, are indicated by sticks above the spectra.

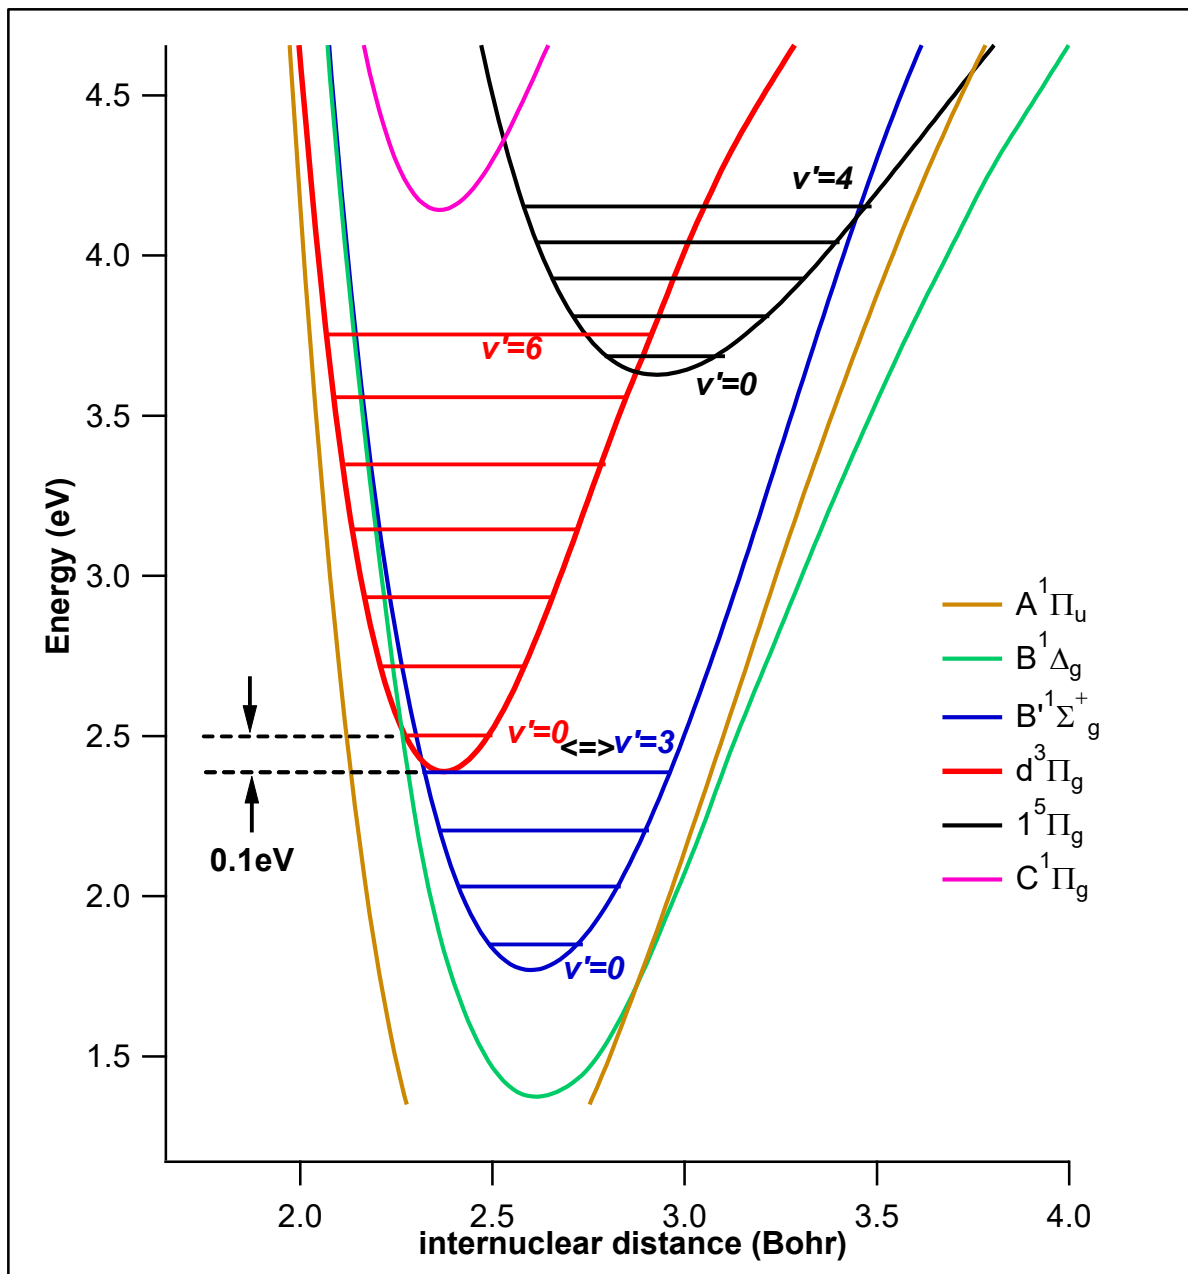

**Fig. S23, Potential energy curves for excited  $C_2$  states:** Potential energy curves for  $C_2^{**}$  derived from ref. [3] and [4]). Spectroscopic constant for  $B' \ ^1\Sigma_g^+$  state of  $\omega_e=1424.11\text{cm}^{-1}$  and  $\omega_e x_e=2.57\text{cm}^{-1}$  were used.[4]

**Tables S1, Images and resonant excitations.**

| Image no. | C <sub>2</sub> H <sub>2</sub> Rydberg states; $nl; ^1\Lambda_g, (v_1v_2v_3v_4v_5)^a$ | One-photon excitation/ nm | Two-photon excitation/ cm <sup>-1</sup> |
|-----------|--------------------------------------------------------------------------------------|---------------------------|-----------------------------------------|
| 1         | $3p; ^1\Delta_g, (00020)$                                                            | 270.364                   | 73969                                   |
| 2         | $3p; ^1\Sigma_g, (00000)$                                                            | 269.255                   | 74279                                   |
| 3         | $3p; ^1\Sigma_g, (01000)$                                                            | 268.262                   | 74554                                   |
| 4         | $3p; ^1\Delta_g, (01020)$                                                            | 263.992                   | 75760                                   |
| 5         | $3p; ^1\Sigma_g, (01000)$                                                            | 262.864                   | 76085                                   |
| 6         | $4p; ^1\Delta_g, (00000)$                                                            | 242.245                   | 82561                                   |
| 7         | $4p; ^1\Sigma_g, (00000)$                                                            | 240.947                   | 83006                                   |

<sup>a</sup> n: principal quantum number for Rydberg electron. l: Rydberg electron orbital. (v<sub>1</sub>, v<sub>2</sub>, v<sub>3</sub>, v<sub>4</sub>, v<sub>5</sub>): vibrational quantum numbers referring to vibrational modes. v<sub>1</sub> (C-H symmetric stretch), v<sub>2</sub> (C-C stretch) v<sub>3</sub> (C-H asymmetric stretch), v<sub>4</sub> and v<sub>5</sub> (bend)

**Table S2 (a), Anisotropy parameters for images:** Anisotropy parameters,  $\beta_n = \beta_2, \beta_4,$  and  $\beta_6$  determined from ion images (see **Fig. S14 – S18** for energy ranges) for  $n = 2 / 2,4 / 2,4,6$  vs. ions and excitations (no/#, 1,2, 4 – 7; see **Table S1**).

| #        | Ion                  | $\beta_2$ | $\beta_4$ | $\beta_6$ | Ion                  | $\beta_2$ | $\beta_4$ | $\beta_6$ | Ion                   | $\beta_2$ | $\beta_4$ | $\beta_6$ | Ion                              | $\beta_2$ | $\beta_4$ | $\beta_6$ | Ion                               | $\beta_2$ | $\beta_4$ | $\beta_6$ |
|----------|----------------------|-----------|-----------|-----------|----------------------|-----------|-----------|-----------|-----------------------|-----------|-----------|-----------|----------------------------------|-----------|-----------|-----------|-----------------------------------|-----------|-----------|-----------|
| <b>1</b> | <b>H<sup>+</sup></b> | 0.87      |           |           | <b>C<sup>+</sup></b> | 0.78      |           |           | <b>CH<sup>+</sup></b> | 0.51      |           |           | <b>C<sub>2</sub><sup>+</sup></b> | 0.36      |           |           | <b>CH<sub>2</sub><sup>+</sup></b> | 0.71      |           |           |
|          |                      | 1         | -0.49     |           |                      | 0.85      | -0.2      |           |                       | 0.49      | 0.06      |           |                                  | 0.35      | 0.02      |           |                                   | 0.65      | 0.18      |           |
|          |                      | 1         | -0.46     | -0.14     |                      | 0.85      | -0.18     | -0.03     |                       | 0.49      | 0.06      | -0.01     |                                  | 0.35      | 0         | 0.03      |                                   | 0.64      | 0.17      | 0.03      |
| <b>2</b> |                      | 0.86      |           |           |                      | 0.49      |           |           |                       | 0.52      |           |           |                                  | 0.32      |           |           |                                   | 0.6       |           |           |
|          |                      | 1         | -0.55     |           |                      | 0.58      | -0.21     |           |                       | 0.52      | 0.01      |           |                                  | 0.35      | -0.06     |           |                                   | 0.52      | 0.18      |           |
|          |                      | 1.01      | -0.46     | -0.33     |                      | 0.59      | -0.17     | -0.08     |                       | 0.51      | -0.01     | 0.03      |                                  | 0.35      | -0.05     | -0.01     |                                   | 0.52      | 0.16      | 0.04      |
| <b>4</b> |                      | 0.8       |           |           |                      | 0.34      |           |           |                       | 0.38      |           |           |                                  | 0.04      |           |           |                                   | 0.8       |           |           |
|          |                      | 0.89      | -0.37     |           |                      | 0.37      | -0.13     |           |                       | 0.37      | -0.06     |           |                                  | 0.05      | -0.01     |           |                                   | 0.89      | -0.37     |           |
|          |                      | 0.89      | -0.3      | -0.27     |                      | 0.37      | -0.13     | 0.01      |                       | 0.37      | -0.05     | -0.03     |                                  | 0.05      | -0.01     | -0.02     |                                   | 0.89      | -0.3      | -0.27     |
| <b>5</b> |                      | 1.14      |           |           |                      | 0.55      |           |           |                       | 0.35      |           |           |                                  | 0.05      |           |           |                                   | 0.1       |           |           |
|          |                      | 1.26      | -0.46     |           |                      | 0.58      | -0.1      |           |                       | 0.33      | 0.08      |           |                                  | 0.05      | 0.01      |           |                                   | 0.08      | 0.04      |           |
|          |                      | 1.27      | -0.38     | -0.33     |                      | 0.58      | -0.1      | -0.03     |                       | 0.33      | 0.08      | -0.01     |                                  | 0.05      | 0.01      | 0.02      |                                   | 0.07      | 0.01      | 0.05      |
| <b>6</b> |                      | 0.84      |           |           |                      | 0.51      |           |           |                       | 0.42      |           |           |                                  | 0         |           |           |                                   | -0.17     |           |           |
|          |                      | 0.9       | -0.21     |           |                      | 0.52      | -0.03     |           |                       | 0.43      | -0.02     |           |                                  | 0         | -0.02     |           |                                   | -0.22     | 0.12      |           |
|          |                      | 0.9       | -0.19     | -0.1      |                      | 0.53      | 0.01      | -0.1      |                       | 0.43      | -0.02     | -0.02     |                                  | 0         | -0.01     | -0.01     |                                   | -0.22     | 0.13      | -0.01     |
| <b>7</b> |                      | 0.88      |           |           |                      | 0.37      |           |           |                       | 0.28      |           |           |                                  | 0.13      |           |           |                                   | 0.12      |           |           |
|          |                      | 0.79      | 0.33      |           |                      | 0.4       | -0.12     |           |                       | 0.29      | 0.05      |           |                                  | 0.14      | -0.02     |           |                                   | 0.03      | 0.23      |           |
|          |                      | 0.79      | 0.26      | 0.28      |                      | 0.4       | -0.1      | -0.1      |                       | 0.32      | 0.08      | 0.17      |                                  | 0.14      | -0.03     | 0.02      |                                   | 0.01      | 0.16      | 0.18      |

**Table S2 (b), Anisotropy parameters for images:** : Anisotropy parameters,  $\beta_n = \beta_2$  and  $\beta_4$ , determined from photoelectron images (see Fig. S19 (a – g) for energy ranges a - h) for  $n = 2 / 2,4$  vs. excitations (no/#, 1 – 7; see Table S1). Repeller voltage: -3 kV.

| -3kV |   | $\beta_2$ | $\beta_4$ |
|------|---|-----------|-----------|-----------|-----------|-----------|-----------|-----------|-----------|-----------|-----------|-----------|-----------|-----------|-----------|-----------|-----------|
| PES  | # | a         | a         | b         | b         | c         | c         | d         | d         | e         | e         | f         | f         | g         | g         | h         | h         |
|      | 1 | 0.47      |           | 0.47      |           | 0.35      |           |           |           |           |           |           |           |           |           |           |           |
|      |   | 0.45      | 0.06      | 0.47      | 0.03      | 0.35      | 0.01      |           |           |           |           |           |           |           |           |           |           |
|      | 2 | 0.48      |           | 0.42      |           | 0.34      |           | 0.39      |           |           |           |           |           |           |           |           |           |
|      |   | 0.46      | 0.03      | 0.4       | 0.03      | 0.35      | -0.03     | 0.38      | 0.02      |           |           |           |           |           |           |           |           |
|      | 3 | 1.29      |           | 0.71      |           |           |           |           |           |           |           |           |           |           |           |           |           |
|      |   | 0.82      | 1.16      | 0.55      | 0.37      |           |           |           |           |           |           |           |           |           |           |           |           |
|      | 4 | -0.16     |           | 0.42      |           | 0.52      |           |           |           |           |           |           |           |           |           |           |           |
|      |   | -0.07     | -0.21     | 0.42      | 0.01      | 0.53      | -0.03     |           |           |           |           |           |           |           |           |           |           |
|      | 5 | -0.07     |           | 0.62      |           | 0.65      |           | 0.49      |           |           |           |           |           |           |           |           |           |
|      |   | 0.02      | -0.19     | 0.57      | 0.07      | 0.57      | 0.06      | 0.5       | -0.02     |           |           |           |           |           |           |           |           |
|      | 6 | 0.17      |           | 0.12      |           | -0.16     |           | -0.14     |           | 0.93      |           | 1.67      |           | 2.83      |           | 2.16      |           |
|      |   | 0.17      | -0.01     | 0.12      | -0.01     | -0.14     | -0.26     | -0.35     | -0.12     | 0.84      | 0.2       | 1.33      | 0.88      | 2.3       | 1.56      | 2.1       | 0.16      |
|      | 7 | 0.01      |           | 0.05      |           | -0.03     |           | 0.03      |           | -0.23     |           | 0.61      |           |           |           |           |           |
|      |   | -0.06     | 0.16      | 0.01      | 0.1       | -0.11     | 0.16      | -0.03     | 0.14      | -0.18     | -0.11     | 0.71      | -0.3      |           |           |           |           |

**Table S2 (c), Anisotropy parameters for images:** : Anisotropy parameters,  $\beta_n = \beta_2$  and  $\beta_4$ , determined from photoelectron images (see Fig. S19 (h – i) for energy ranges, a - f) for  $n = 2 / 2,4$  vs. excitations (no. / #: 6 – 7; see Table S1). Repeller voltage: -5 kV.

| -5kV |   | $\beta_2$ | $\beta_4$ |
|------|---|-----------|-----------|-----------|-----------|-----------|-----------|-----------|-----------|-----------|-----------|-----------|-----------|
| PES  | # | a         | a         | b         | b         | c         | c         | d         | d         | e         | e         | f         | f         |
|      | 6 | 0.13      |           | -0.14     |           | 0.56      |           | 0.5       |           | 0.72      |           | 0.56      |           |
|      |   | 0.14      | -0.01     | -0.09     | -0.11     | 0.6       | -0.09     | 0.5       | -0.01     | 0.6       | 0.3       | 0.6       | -0.1      |
|      | 7 | 0.06      |           | 0.67      |           | 0.39      |           | 0.13      |           |           |           |           |           |
|      |   | 0.04      | 0.04      | 0.69      | -0.03     | 0.33      | 0.12      | -0.03     | 0.35      |           |           |           |           |

**Table S3, Dissociation products:** Low-lying valance states of CH/CH\*, correlating to H (n=1) + C ( $^3P_0$ ,  $^1D_2$ ,  $^1S_0$ ,  $^5S_0$ ), according to *ab initio* calculation by Vázquez et al.[5]

| Molecular states                           | Atomic energies (eV) | Atomic states |
|--------------------------------------------|----------------------|---------------|
| $c^4\Sigma^-, (1)^6\Sigma^-$               | 4.182                | C( $^5S_0$ )  |
| $(2)^2\Sigma^+$ ,                          | 2.684                | C( $^1S_0$ )  |
| $A^2\Delta, C^2\Sigma^+, (2)D^2\Pi$        | 1.263                | C( $^1D_2$ )  |
| $X^2\Pi, B^2\Sigma^-, a^4\Sigma^-, b^4\Pi$ | 0.000                | C( $^3P_0$ )  |

**Table S4 (a) Thresholds vs. fragment dissociation:** Dissociation energies ( $D_0$ ) for fragments of  $C_2H_2$ . m(min) are the minimum number of photons required for the fragment formations in multiphoton dissociation, corresponding to excitation no. 7 (**Table S1**).

| Fragment                               | $D_0$ (eV)          | m(min)/ $h\nu$ |
|----------------------------------------|---------------------|----------------|
| H(n=1) + $C_2H(X)$                     | 5.712 <sup>a</sup>  | 2              |
| H*(n=2) + $C_2H(X)$                    | 15.911 <sup>b</sup> | 4              |
| H(n=1) + $C_2H^*(B')$                  | 9.352 <sup>b</sup>  | 2              |
| H2 + $C_2(X)$                          | 6.333 <sup>c</sup>  | 2              |
| H2 + $C_2(d)$                          | 8.816 <sup>b</sup>  | 2              |
| H2 + $C_2(C)$                          | 10.581 <sup>b</sup> | 3              |
| $CH_2(X) + C(^3P_0)$                   | 9.170 <sup>c</sup>  | 2              |
| $CH_2(X) + C^*(^1D_2)$                 | 10.433 <sup>b</sup> | 3              |
| $CH_2(X) + C^*(^1S_0)$                 | 11.854 <sup>b</sup> | 3              |
| $CH_2(X) + C^*(^5S_0)$                 | 13.352 <sup>b</sup> | 3              |
| $CH_2(X) + C^*(^3P_0)$                 | 16.650 <sup>b</sup> | 4              |
| $CH_2(X) + C^*(^1P_1)$                 | 16.854 <sup>b</sup> | 4              |
| $CH_2(X) + C^*(^3D_3)$                 | 17.115 <sup>b</sup> | 4              |
| CH(X) + CH(X)                          | 9.921 <sup>d</sup>  | 2              |
| CH(X) + CH*(A)                         | 12.796 <sup>b</sup> | 3              |
| CH(X) + CH*(B)                         | 13.150 <sup>b</sup> | 3              |
| CH(X) + CH*(C)                         | 13.864 <sup>b</sup> | 3              |
| 2H + $C_2(X)$                          | 11.174 <sup>b</sup> | 3              |
| 2H + $C_2^*(d)$                        | 13.657 <sup>b</sup> | 3              |
| 2H + $C_2^*(C)$                        | 15.422 <sup>b</sup> | 4              |
| CH(X) + H + $C(^3P_0)$                 | 13.666 <sup>b</sup> | 3              |
| H <sub>2</sub> + $C(^3P_0) + C(^3P_0)$ | 12.475 <sup>b</sup> | 3              |

a. From Mordaunt's paper (Ref. [6])

b. Calculated values refers to fragment energetic in NIST (Ref. [7])

c. From Matthiasson's paper (Ref. [8])

d. From Evrin's paper (Ref. [9])

**Table S4 (b), Thresholds vs. ionizations:** Ionization energies (IE) for the parent molecule and fragments.  $m(\min)$  are the minimum number of photons required for ionization of the species in multiphoton excitation, corresponding to excitation no. 7 (**Table S1**).  $E_{\text{thr}}$  are common thresholds for ionization of fragment species according to equation  $E_{\text{thr}}(\text{Fi}/\text{Fi}^*) = nh\nu - \text{IE}(\text{Fi}/\text{Fi}^*)$ ;  $n = 1,2,3$  with respect to the “reference spectrum”, no. 7. (see main text).

| Molecule                         | $m(\min) / h\nu$ | IE(eV) | $E_{\text{thr}}(\text{eV})$ |
|----------------------------------|------------------|--------|-----------------------------|
| $\text{C}_2\text{H}_2(\text{X})$ | 3                | 11.400 | 4.037                       |
|                                  |                  |        |                             |
| Fragments                        | $m(\min) / h\nu$ | IE(eV) | $E_{\text{thr}}(\text{eV})$ |
| H(n=1)                           | 3                | 13.598 | 1.837                       |
| H*(n=2)                          | 1                | 13.598 | 1.744                       |
| C( $^3\text{P}_0$ )              | 3                | 11.260 | 4.177                       |
| C*( $^1\text{D}_2$ )             | 2                | 11.260 | 0.295                       |
| C*( $^1\text{S}_0$ )             | 2                | 11.260 | 1.715                       |
| C*( $^5\text{S}_2$ )             | 2                | 11.260 | 3.214                       |
| C*( $^3\text{P}^{\circ}_0$ )     | 1                | 11.260 | 1.366                       |
| C*( $^1\text{P}^{\circ}_1$ )     | 1                | 11.260 | 1.570                       |
| C*( $^3\text{D}^{\circ}_3$ )     | 1                | 11.260 | 1.831                       |
| CH(X)                            | 3                | 10.640 | 4.797                       |
| CH*(A)                           | 2                | 10.640 | 2.521                       |
| CH*(B)                           | 2                | 10.640 | 2.882                       |
| CH*(C)                           | 2                | 10.640 | 3.595                       |
| CH <sub>2</sub> (X)              | 3                | 10.640 | 5.037                       |
| C <sub>2</sub> (X)               | 3                | 11.866 | 3.659                       |
| C <sub>2</sub> *(d)              | 2                | 11.866 | 0.908                       |
| C <sub>2</sub> *(C)              | 2                | 11.866 | 2.450                       |
| C <sub>2</sub> H(X)              | 3                | 11.610 | 3.827                       |
| C <sub>2</sub> H*(B')            | 2                | 11.610 | 2.321                       |

a. From NIST (Ref. [7])

b. From Krechkivska's paper (Ref. [10])



## References:

1. M. N. R. Ashfold, B. Tutchter, B. Yang, Z. K. Jin and S. L. Anderson, *J. Chem. Phys.*, 1987, **87**, 5105-5115.
2. K. Tsuji, N. Arakawa, A. Kawai and K. Shibuya, *J. Phys. Chem. A*, 2002, **106**, 747-753.
3. J. F. Babb, R. T. Smyth and B. M. McLaughlin, *Astrophys. J.*, 2019, **876**, 38.
4. M. Martin, *J. Photochem. Photobiol. A*, 1992, **66**, 263-289.
5. G. J. Vázquez, J. M. Amero, H. P. Liebermann, R. J. Buenker and H. Lefebvre-Brion, *J. Chem. Phys.*, 2007, **126**, 164302.
6. D. H. Mordaunt and M. N. R. Ashfold, *J. Chem. Phys.*, 1994, **101**, 2630-2631.
7. NIST Chemistry WebBook - (National Institute of Standards and Technology)  
<https://webbook.nist.gov/chemistry/name-ser/>
8. K. Matthiasson, H. Wang and Á. Kvaran, *Chem. Phys. L*, 2008, **458**, 58-63.
9. K. M. Ervin, S. Gronert, S. E. Barlow, M. K. Gilles, A. G. Harrison, V. M. Bierbaum, C. H. DePuy, W. C. Lineberger and G. B. Ellison, *J. Am. Chem. Soc.*, 1990, **112**, 5750-5759.
10. O. Krechkivska, G. B. Bacskay, B. A. Welsh, K. Nauta, S. H. Kable, J. F. Stanton and T. W. Schmidt, *J. Chem. Phys.*, 2016, **144**, 144305.
